# Supplementary material
Source: publisher figshare collection journal article supplement (https://acs.figshare.com/ndownloader/files/4033945)
Supplement: Supplementary file 1 [file 4033945]

 
data_dpmPtPh2
  
_audit_creation_method            SHELXL-97 
_chemical_name_systematic 
; 
 ? 
; 
_chemical_name_common             ? 
_chemical_melting_point           ? 
_chemical_formula_moiety          ? 
_chemical_formula_sum 
 'C23 H20 N2 Pt' 
_chemical_formula_weight          519.50 
  
loop_ 
 _atom_type_symbol 
 _atom_type_description 
 _atom_type_scat_dispersion_real 
 _atom_type_scat_dispersion_imag 
 _atom_type_scat_source 
 'C'  'C'   0.0033   0.0016 
 'International Tables Vol C Tables 4.2.6.8 and 6.1.1.4' 
 'H'  'H'   0.0000   0.0000 
 'International Tables Vol C Tables 4.2.6.8 and 6.1.1.4' 
 'N'  'N'   0.0061   0.0033 
 'International Tables Vol C Tables 4.2.6.8 and 6.1.1.4' 
 'Pt'  'Pt'  -1.7033   8.3905 
 'International Tables Vol C Tables 4.2.6.8 and 6.1.1.4' 
  
_symmetry_cell_setting            Monoclinic 
_symmetry_space_group_name_H-M    P2(1) 
  
loop_ 
 _symmetry_equiv_pos_as_xyz 
 'x, y, z' 
 '-x, y+1/2, -z' 
  
_cell_length_a                    5.6282(6) 
_cell_length_b                    18.1085(18) 
_cell_length_c                    9.0735(9) 
_cell_angle_alpha                 90.00 
_cell_angle_beta                  100.920(2) 
_cell_angle_gamma                 90.00 
_cell_volume                      908.01(16) 
_cell_formula_units_Z             2 
_cell_measurement_temperature     153(2) 
_cell_measurement_reflns_used     9947 
_cell_measurement_theta_min       4.08 
_cell_measurement_theta_max       33.17 
  
_exptl_crystal_description        plate 
_exptl_crystal_colour             colorless 
_exptl_crystal_size_max           0.27 
_exptl_crystal_size_mid           0.22 
_exptl_crystal_size_min           0.08 
_exptl_crystal_density_meas       'not measured' 
_exptl_crystal_density_diffrn     1.903 
_exptl_crystal_density_method     'not measured' 
_exptl_crystal_F_000              500 
_exptl_absorpt_coefficient_mu     7.747 
_exptl_absorpt_correction_type    empirical 
_exptl_absorpt_correction_T_min   0.4781  
_exptl_absorpt_correction_T_max   0.7465 
_exptl_absorpt_process_details    'Bruker SADABS' 
  
_exptl_special_details 
; 
 ? 
; 
  
_diffrn_ambient_temperature       153(2) 
_diffrn_radiation_wavelength      0.71073 
_diffrn_radiation_type            MoK\a 
_diffrn_radiation_source          'fine-focus sealed tube' 
_diffrn_radiation_monochromator   graphite 
_diffrn_measurement_device_type   'Bruker APEX-II CCD' 
_diffrn_measurement_method        '\f and \w scans' 
_diffrn_detector_area_resol_mean  ? 
_diffrn_reflns_number             8699 
_diffrn_reflns_av_R_equivalents   0.0477 
_diffrn_reflns_av_sigmaI/netI     0.0531 
_diffrn_reflns_limit_h_min        -6 
_diffrn_reflns_limit_h_max        5 
_diffrn_reflns_limit_k_min        -20 
_diffrn_reflns_limit_k_max        20 
_diffrn_reflns_limit_l_min        -10 
_diffrn_reflns_limit_l_max        10 
_diffrn_reflns_theta_min          4.08 
_diffrn_reflns_theta_max          24.00 
_reflns_number_total              2827
_reflns_number_gt                 2557 
_reflns_threshold_expression      >2sigma(I) 
  
_computing_data_collection        'Bruker APEX2' 
_computing_cell_refinement        'Bruker SAINT' 
_computing_data_reduction         'Bruker SAINT' 
_computing_structure_solution     'SHELXS-97 (Sheldrick, 2008)' 
_computing_structure_refinement   'SHELXL-97 (Sheldrick, 2008)' 
_computing_molecular_graphics     'Bruker SHELXTL' 
_computing_publication_material   'Bruker SHELXTL' 
  
_refine_special_details 
; 
 Refinement of F^2^ against ALL reflections.  The weighted R-factor wR and 
 goodness of fit S are based on F^2^, conventional R-factors R are based 
 on F, with F set to zero for negative F^2^. The threshold expression of 
 F^2^ > 2sigma(F^2^) is used only for calculating R-factors(gt) etc. and is 
 not relevant to the choice of reflections for refinement.  R-factors based 
 on F^2^ are statistically about twice as large as those based on F, and R- 
 factors based on ALL data will be even larger. 
; 
  
_refine_ls_structure_factor_coef  Fsqd 
_refine_ls_matrix_type            full 
_refine_ls_weighting_scheme       calc 
_refine_ls_weighting_details 
 'calc w=1/[\s^2^(Fo^2^)+(0.0366P)^2^+0.0000P] where P=(Fo^2^+2Fc^2^)/3' 
_atom_sites_solution_primary      direct 
_atom_sites_solution_secondary    difmap 
_atom_sites_solution_hydrogens    geom 
_refine_ls_hydrogen_treatment     constr 
_refine_ls_extinction_method      none 
_refine_ls_extinction_coef        0 
_refine_ls_abs_structure_details 
 'Flack H D (1983), Acta Cryst. A39, 876-881' 
_refine_ls_abs_structure_Flack    0.011(16) 
_refine_ls_number_reflns          2779 
_refine_ls_number_parameters      235 
_refine_ls_number_restraints      1 
_refine_ls_R_factor_all           0.0376 
_refine_ls_R_factor_gt            0.0324 
_refine_ls_wR_factor_ref          0.0732 
_refine_ls_wR_factor_gt           0.0709 
_refine_ls_goodness_of_fit_ref    1.090 
_refine_ls_restrained_S_all       1.089 
_refine_ls_shift/su_max           0.000 
_refine_ls_shift/su_mean          0.000 
  
loop_ 
 _atom_site_label 
 _atom_site_type_symbol 
 _atom_site_fract_x 
 _atom_site_fract_y 
 _atom_site_fract_z 
 _atom_site_U_iso_or_equiv 
 _atom_site_adp_type 
 _atom_site_occupancy 
 _atom_site_symmetry_multiplicity 
 _atom_site_calc_flag 
 _atom_site_refinement_flags 
 _atom_site_disorder_assembly 
 _atom_site_disorder_group 
Pt Pt 0.40529(6) 0.73166(3) 0.27642(3) 0.01857(12) Uani 1 1 d . . . 
N1 N 0.2769(16) 0.6861(4) 0.0590(9) 0.0222(19) Uani 1 1 d . . . 
N2 N 0.3282(16) 0.6254(4) 0.3615(8) 0.0199(19) Uani 1 1 d . . . 
C1 C 0.466(2) 0.8302(5) 0.1861(9) 0.026(2) Uani 1 1 d . . . 
C2 C 0.2736(19) 0.8648(5) 0.0922(10) 0.021(2) Uani 1 1 d . . . 
H2 H 0.1240 0.8413 0.0704 0.025 Uiso 1 1 calc R . . 
C3 C 0.301(2) 0.9339(5) 0.0301(10) 0.024(2) Uani 1 1 d . . . 
H3 H 0.1694 0.9567 -0.0306 0.029 Uiso 1 1 calc R . . 
C4 C 0.525(2) 0.9687(5) 0.0592(11) 0.029(3) Uani 1 1 d . . . 
H4 H 0.5457 1.0143 0.0159 0.035 Uiso 1 1 calc R . . 
C5 C 0.714(2) 0.9354(5) 0.1524(11) 0.027(2) Uani 1 1 d . . . 
H5 H 0.8645 0.9586 0.1735 0.032 Uiso 1 1 calc R . . 
C6 C 0.683(2) 0.8672(5) 0.2152(10) 0.022(2) Uani 1 1 d . . . 
H6 H 0.8138 0.8456 0.2791 0.026 Uiso 1 1 calc R . . 
C7 C 0.519(2) 0.7767(5) 0.4810(11) 0.025(2) Uani 1 1 d . . . 
C8 C 0.360(2) 0.8213(5) 0.5446(10) 0.021(2) Uani 1 1 d . . . 
H8 H 0.2047 0.8298 0.4904 0.025 Uiso 1 1 calc R . . 
C9 C 0.427(2) 0.8526(5) 0.6848(11) 0.027(3) Uani 1 1 d . . . 
H9 H 0.3182 0.8826 0.7224 0.032 Uiso 1 1 calc R . . 
C10 C 0.653(2) 0.8401(5) 0.7698(11) 0.027(3) Uani 1 1 d . . . 
H10 H 0.6976 0.8603 0.8653 0.032 Uiso 1 1 calc R . . 
C11 C 0.815(2) 0.7965(5) 0.7093(10) 0.023(2) Uani 1 1 d . . . 
H11 H 0.9697 0.7882 0.7641 0.027 Uiso 1 1 calc R . . 
C12 C 0.746(2) 0.7649(5) 0.5660(10) 0.020(2) Uani 1 1 d . . . 
H12 H 0.8553 0.7354 0.5279 0.024 Uiso 1 1 calc R . . 
C13 C 0.3951(19) 0.6979(5) -0.0529(10) 0.017(2) Uani 1 1 d . . . 
H13 H 0.5340 0.7270 -0.0353 0.020 Uiso 1 1 calc R . . 
C14 C 0.318(2) 0.6684(5) -0.1945(11) 0.029(3) Uani 1 1 d . . . 
H14 H 0.4002 0.6778 -0.2721 0.034 Uiso 1 1 calc R . . 
C15 C 0.113(2) 0.6244(5) -0.2167(11) 0.030(3) Uani 1 1 d . . . 
H15 H 0.0571 0.6030 -0.3101 0.037 Uiso 1 1 calc R . . 
C16 C -0.007(2) 0.6122(5) -0.1019(11) 0.025(2) Uani 1 1 d . . . 
H16 H -0.1465 0.5834 -0.1167 0.031 Uiso 1 1 calc R . . 
C17 C 0.082(2) 0.6439(5) 0.0391(10) 0.022(2) Uani 1 1 d . . . 
C18 C -0.0439(19) 0.6315(5) 0.1719(10) 0.022(2) Uani 1 1 d . . . 
H18A H -0.1887 0.6021 0.1400 0.026 Uiso 1 1 calc R . . 
H18B H -0.0921 0.6787 0.2074 0.026 Uiso 1 1 calc R . . 
C19 C 0.125(2) 0.5918(5) 0.2999(11) 0.024(2) Uani 1 1 d . . . 
C20 C 0.068(2) 0.5214(5) 0.3460(11) 0.035(3) Uani 1 1 d . . . 
H20 H -0.0763 0.4986 0.3017 0.041 Uiso 1 1 calc R . . 
C21 C 0.228(3) 0.4861(5) 0.4581(11) 0.038(3) Uani 1 1 d . . . 
H21 H 0.1932 0.4396 0.4918 0.046 Uiso 1 1 calc R . . 
C22 C 0.442(2) 0.5215(5) 0.5188(11) 0.035(3) Uani 1 1 d . . . 
H22 H 0.5551 0.4986 0.5926 0.042 Uiso 1 1 calc R . . 
C23 C 0.485(2) 0.5912(5) 0.4688(10) 0.027(3) Uani 1 1 d . . . 
H23 H 0.6281 0.6151 0.5111 0.032 Uiso 1 1 calc R . . 
  
loop_ 
 _atom_site_aniso_label 
 _atom_site_aniso_U_11 
 _atom_site_aniso_U_22 
 _atom_site_aniso_U_33 
 _atom_site_aniso_U_23 
 _atom_site_aniso_U_13 
 _atom_site_aniso_U_12 
Pt 0.0258(2) 0.01333(15) 0.01647(17) 0.0003(3) 0.00366(11) -0.0007(3) 
N1 0.023(6) 0.017(4) 0.024(5) -0.003(3) 0.000(4) 0.000(4) 
N2 0.023(5) 0.023(4) 0.018(4) 0.004(3) 0.016(4) 0.006(4) 
C1 0.031(7) 0.024(5) 0.027(4) 0.006(3) 0.022(4) 0.014(4) 
C2 0.013(6) 0.031(5) 0.019(5) -0.007(4) 0.002(4) -0.007(4) 
C3 0.034(7) 0.015(4) 0.022(5) 0.002(4) 0.001(5) 0.010(4) 
C4 0.044(8) 0.016(5) 0.030(6) 0.001(4) 0.013(6) 0.000(5) 
C5 0.033(8) 0.019(5) 0.029(6) -0.005(4) 0.006(5) -0.007(4) 
C6 0.026(7) 0.021(5) 0.020(5) 0.003(4) 0.006(4) -0.004(4) 
C7 0.024(7) 0.018(5) 0.036(6) -0.005(4) 0.015(5) -0.009(4) 
C8 0.015(6) 0.030(5) 0.017(5) 0.003(4) 0.006(4) -0.002(4) 
C9 0.038(8) 0.024(5) 0.022(6) -0.002(4) 0.013(5) 0.004(5) 
C10 0.039(8) 0.023(5) 0.019(5) 0.000(4) 0.008(5) -0.005(5) 
C11 0.019(6) 0.026(5) 0.021(5) 0.002(4) 0.001(4) -0.003(4) 
C12 0.024(7) 0.019(4) 0.015(5) 0.001(3) 0.001(4) 0.001(4) 
C13 0.019(6) 0.020(4) 0.014(5) 0.003(3) 0.012(4) 0.003(4) 
C14 0.047(8) 0.021(5) 0.021(5) 0.005(4) 0.014(5) 0.006(5) 
C15 0.047(8) 0.019(5) 0.019(5) -0.001(4) -0.012(5) 0.006(5) 
C16 0.037(8) 0.015(4) 0.022(5) -0.001(4) -0.001(5) 0.001(4) 
C17 0.022(7) 0.017(5) 0.028(5) 0.002(4) 0.005(5) 0.010(4) 
C18 0.014(6) 0.024(5) 0.028(5) 0.000(4) 0.007(4) -0.001(4) 
C19 0.024(7) 0.024(5) 0.024(5) -0.009(4) 0.005(4) -0.007(5) 
C20 0.058(9) 0.020(5) 0.027(6) -0.002(4) 0.014(5) -0.020(5) 
C21 0.075(11) 0.020(5) 0.023(6) 0.001(4) 0.018(6) -0.013(6) 
C22 0.062(10) 0.022(5) 0.022(6) 0.007(4) 0.007(5) 0.006(6) 
C23 0.037(8) 0.031(5) 0.013(5) -0.006(4) 0.006(5) 0.004(5) 
  
_geom_special_details 
; 
 All esds (except the esd in the dihedral angle between two l.s. planes) 
 are estimated using the full covariance matrix.  The cell esds are taken 
 into account individually in the estimation of esds in distances, angles 
 and torsion angles; correlations between esds in cell parameters are only 
 used when they are defined by crystal symmetry.  An approximate (isotropic) 
 treatment of cell esds is used for estimating esds involving l.s. planes. 
; 
  
loop_ 
 _geom_bond_atom_site_label_1 
 _geom_bond_atom_site_label_2 
 _geom_bond_distance 
 _geom_bond_site_symmetry_2 
 _geom_bond_publ_flag 
Pt C7 2.016(10) . ? 
Pt C1 2.018(8) . ? 
Pt N1 2.133(7) . ? 
Pt N2 2.147(7) . ? 
N1 C17 1.321(13) . ? 
N1 C13 1.332(12) . ? 
N2 C19 1.323(13) . ? 
N2 C23 1.336(13) . ? 
C1 C6 1.377(15) . ? 
C1 C2 1.391(14) . ? 
C2 C3 1.392(13) . ? 
C3 C4 1.388(16) . ? 
C4 C5 1.369(16) . ? 
C5 C6 1.385(13) . ? 
C7 C12 1.375(15) . ? 
C7 C8 1.408(14) . ? 
C8 C9 1.378(14) . ? 
C9 C10 1.376(17) . ? 
C10 C11 1.392(15) . ? 
C11 C12 1.406(13) . ? 
C13 C14 1.383(14) . ? 
C14 C15 1.384(16) . ? 
C15 C16 1.362(16) . ? 
C16 C17 1.404(13) . ? 
C17 C18 1.524(14) . ? 
C18 C19 1.531(14) . ? 
C19 C20 1.397(14) . ? 
C20 C21 1.381(17) . ? 
C21 C22 1.381(18) . ? 
C22 C23 1.376(14) . ? 
  
loop_ 
 _geom_angle_atom_site_label_1 
 _geom_angle_atom_site_label_2 
 _geom_angle_atom_site_label_3 
 _geom_angle 
 _geom_angle_site_symmetry_1 
 _geom_angle_site_symmetry_3 
 _geom_angle_publ_flag 
C7 Pt C1 88.2(4) . . ? 
C7 Pt N1 178.5(4) . . ? 
C1 Pt N1 91.1(3) . . ? 
C7 Pt N2 94.7(3) . . ? 
C1 Pt N2 176.9(4) . . ? 
N1 Pt N2 86.0(3) . . ? 
C17 N1 C13 120.7(8) . . ? 
C17 N1 Pt 118.5(7) . . ? 
C13 N1 Pt 120.8(7) . . ? 
C19 N2 C23 119.6(8) . . ? 
C19 N2 Pt 118.5(6) . . ? 
C23 N2 Pt 121.8(7) . . ? 
C6 C1 C2 117.2(8) . . ? 
C6 C1 Pt 124.3(7) . . ? 
C2 C1 Pt 118.4(8) . . ? 
C1 C2 C3 121.4(10) . . ? 
C4 C3 C2 119.7(10) . . ? 
C5 C4 C3 119.4(9) . . ? 
C4 C5 C6 120.2(11) . . ? 
C1 C6 C5 122.1(10) . . ? 
C12 C7 C8 117.0(9) . . ? 
C12 C7 Pt 123.5(7) . . ? 
C8 C7 Pt 119.5(8) . . ? 
C9 C8 C7 122.0(10) . . ? 
C10 C9 C8 120.8(10) . . ? 
C9 C10 C11 118.4(9) . . ? 
C10 C11 C12 120.6(10) . . ? 
C7 C12 C11 121.3(10) . . ? 
N1 C13 C14 122.0(10) . . ? 
C13 C14 C15 117.7(10) . . ? 
C16 C15 C14 120.1(9) . . ? 
C15 C16 C17 119.2(10) . . ? 
N1 C17 C16 120.2(9) . . ? 
N1 C17 C18 118.3(8) . . ? 
C16 C17 C18 121.4(10) . . ? 
C17 C18 C19 110.8(8) . . ? 
N2 C19 C20 121.4(10) . . ? 
N2 C19 C18 117.8(8) . . ? 
C20 C19 C18 120.7(10) . . ? 
C21 C20 C19 119.2(11) . . ? 
C22 C21 C20 118.4(9) . . ? 
C23 C22 C21 119.3(11) . . ? 
N2 C23 C22 122.0(11) . . ? 
  
_diffrn_measured_fraction_theta_max    0.991 
_diffrn_reflns_theta_full              24.00 
_diffrn_measured_fraction_theta_full   0.991 
_refine_diff_density_max    1.625 
_refine_diff_density_min   -2.027 
_refine_diff_density_rms    0.162 

#===END

 
data_Me2DPMPtPh2
  
_audit_creation_method            SHELXL-97 
_chemical_name_systematic 
; 
 ? 
; 
_chemical_name_common             ? 
_chemical_melting_point           ? 
_chemical_formula_moiety          ? 
_chemical_formula_sum 
 'C50 H48 N4 Pt2' 
_chemical_formula_weight          1095.10 
  
loop_ 
 _atom_type_symbol 
 _atom_type_description 
 _atom_type_scat_dispersion_real 
 _atom_type_scat_dispersion_imag 
 _atom_type_scat_source 
 'C'  'C'   0.0033   0.0016 
 'International Tables Vol C Tables 4.2.6.8 and 6.1.1.4' 
 'H'  'H'   0.0000   0.0000 
 'International Tables Vol C Tables 4.2.6.8 and 6.1.1.4' 
 'N'  'N'   0.0061   0.0033 
 'International Tables Vol C Tables 4.2.6.8 and 6.1.1.4' 
 'Pt'  'Pt'  -1.7033   8.3905 
 'International Tables Vol C Tables 4.2.6.8 and 6.1.1.4' 
  
_symmetry_cell_setting            Monoclinic 
_symmetry_space_group_name_H-M    P2(1)/n 
  
loop_ 
 _symmetry_equiv_pos_as_xyz 
 'x, y, z' 
 '-x+1/2, y+1/2, -z+1/2' 
 '-x, -y, -z' 
 'x-1/2, -y-1/2, z-1/2' 
  
_cell_length_a                    8.2151(3) 
_cell_length_b                    14.4433(5) 
_cell_length_c                    17.3348(6) 
_cell_angle_alpha                 90.00 
_cell_angle_beta                  95.5740(10) 
_cell_angle_gamma                 90.00 
_cell_volume                      2047.1(1) 
_cell_formula_units_Z             2 
_cell_measurement_temperature     153(2) 
_cell_measurement_reflns_used     9234 
_cell_measurement_theta_min       2.86 
_cell_measurement_theta_max       32.57 
  
_exptl_crystal_description        prism 
_exptl_crystal_colour             colourless 
_exptl_crystal_size_max           0.39 
_exptl_crystal_size_mid           0.29 
_exptl_crystal_size_min           0.27 
_exptl_crystal_density_meas       0 
_exptl_crystal_density_diffrn     1.777 
_exptl_crystal_density_method     'not measured' 
_exptl_crystal_F_000              1064 
_exptl_absorpt_coefficient_mu     6.867 
_exptl_absorpt_correction_type    empirical 
_exptl_absorpt_correction_T_min   0.1748 
_exptl_absorpt_correction_T_max   0.2586 
_exptl_absorpt_process_details    'Bruker SADABS' 
  
_exptl_special_details 
; 
 ? 
; 
  
_diffrn_ambient_temperature       153(2) 
_diffrn_radiation_wavelength      0.71073 
_diffrn_radiation_type            MoK\a 
_diffrn_radiation_source          'fine-focus sealed tube' 
_diffrn_radiation_monochromator   graphite 
_diffrn_measurement_device_type   'Bruker APEX-II CCD' 
_diffrn_measurement_method        '\f and \w scans' 
_diffrn_detector_area_resol_mean  ? 
_diffrn_reflns_number             30795 
_diffrn_reflns_av_R_equivalents   0.0246 
_diffrn_reflns_av_sigmaI/netI     0.0196 
_diffrn_reflns_limit_h_min        -12 
_diffrn_reflns_limit_h_max        10 
_diffrn_reflns_limit_k_min        -19 
_diffrn_reflns_limit_k_max        21 
_diffrn_reflns_limit_l_min        -24 
_diffrn_reflns_limit_l_max        25 
_diffrn_reflns_theta_min          1.84 
_diffrn_reflns_theta_max          32.57 
_reflns_number_total              7072 
_reflns_number_gt                 6593 
_reflns_threshold_expression      >2sigma(I) 
  
_computing_data_collection        'Bruker APEX2' 
_computing_cell_refinement        'Bruker SAINT' 
_computing_data_reduction         'Bruker SAINT' 
_computing_structure_solution     'SHELXS-97 (Sheldrick, 2008)' 
_computing_structure_refinement   'SHELXL-97 (Sheldrick, 2008)' 
_computing_molecular_graphics     'Bruker SHELXTL' 
_computing_publication_material   'Bruker SHELXTL' 
  
_refine_special_details 
; 
 Refinement of F^2^ against ALL reflections.  The weighted R-factor wR and 
 goodness of fit S are based on F^2^, conventional R-factors R are based 
 on F, with F set to zero for negative F^2^. The threshold expression of 
 F^2^ > 2sigma(F^2^) is used only for calculating R-factors(gt) etc. and is 
 not relevant to the choice of reflections for refinement.  R-factors based 
 on F^2^ are statistically about twice as large as those based on F, and R- 
 factors based on ALL data will be even larger. 
; 
  
_refine_ls_structure_factor_coef  Fsqd 
_refine_ls_matrix_type            full 
_refine_ls_weighting_scheme       calc 
_refine_ls_weighting_details 
 'calc w=1/[\s^2^(Fo^2^)+(0.1000P)^2^+0.0000P] where P=(Fo^2^+2Fc^2^)/3' 
_atom_sites_solution_primary      direct 
_atom_sites_solution_secondary    difmap 
_atom_sites_solution_hydrogens    geom 
_refine_ls_hydrogen_treatment     mixed 
_refine_ls_extinction_method      none 
_refine_ls_extinction_coef        0 
_refine_ls_number_reflns          7072 
_refine_ls_number_parameters      255 
_refine_ls_number_restraints      0 
_refine_ls_R_factor_all           0.0261 
_refine_ls_R_factor_gt            0.0235 
_refine_ls_wR_factor_ref          0.0999 
_refine_ls_wR_factor_gt           0.0957 
_refine_ls_goodness_of_fit_ref    0.873 
_refine_ls_restrained_S_all       0.873 
_refine_ls_shift/su_max           0.002 
_refine_ls_shift/su_mean          0.000 
  
loop_ 
 _atom_site_label 
 _atom_site_type_symbol 
 _atom_site_fract_x 
 _atom_site_fract_y 
 _atom_site_fract_z 
 _atom_site_U_iso_or_equiv 
 _atom_site_adp_type 
 _atom_site_occupancy 
 _atom_site_symmetry_multiplicity 
 _atom_site_calc_flag 
 _atom_site_refinement_flags 
 _atom_site_disorder_assembly 
 _atom_site_disorder_group 
Pt Pt 0.530608(10) 0.206234(5) 0.892875(5) 0.01501(5) Uani 1 1 d . . . 
N1 N 0.7453(3) 0.18827(16) 0.83465(13) 0.0181(4) Uani 1 1 d . . . 
N2 N 0.6235(2) 0.34343(13) 0.91203(12) 0.0181(4) Uani 1 1 d . . . 
C1 C 0.3270(3) 0.23043(17) 0.94383(13) 0.0160(4) Uani 1 1 d . . . 
C2 C 0.2882(3) 0.1863(2) 1.01212(16) 0.0230(5) Uani 1 1 d . . . 
H2 H 0.3624 0.1424 1.0364 0.028 Uiso 1 1 calc R . . 
C3 C 0.1437(4) 0.20545(16) 1.0452(2) 0.0269(6) Uani 1 1 d . . . 
H3 H 0.1220 0.1750 1.0917 0.032 Uiso 1 1 calc R . . 
C4 C 0.0320(3) 0.2679(2) 1.01115(17) 0.0265(5) Uani 1 1 d . . . 
H4 H -0.0675 0.2796 1.0331 0.032 Uiso 1 1 calc R . . 
C5 C 0.0673(3) 0.3137(2) 0.94375(17) 0.0248(5) Uani 1 1 d . . . 
H5 H -0.0077 0.3575 0.9198 0.030 Uiso 1 1 calc R . . 
C6 C 0.2115(4) 0.29520(14) 0.91206(17) 0.0200(5) Uani 1 1 d . . . 
H6 H 0.2338 0.3277 0.8666 0.024 Uiso 1 1 calc R . . 
C7 C 0.4376(3) 0.08422(16) 0.85651(14) 0.0180(4) Uani 1 1 d . . . 
C8 C 0.4276(3) 0.06582(18) 0.77593(15) 0.0253(5) Uani 1 1 d . . . 
H8 H 0.4681 0.1105 0.7424 0.030 Uiso 1 1 calc R . . 
C9 C 0.3601(4) -0.0159(2) 0.74434(17) 0.0316(6) Uani 1 1 d . . . 
H9 H 0.3546 -0.0259 0.6900 0.038 Uiso 1 1 calc R . . 
C10 C 0.3008(3) -0.08279(19) 0.79193(18) 0.0294(5) Uani 1 1 d . . . 
H10 H 0.2537 -0.1383 0.7705 0.035 Uiso 1 1 calc R . . 
C11 C 0.3112(3) -0.06740(18) 0.87069(18) 0.0293(5) Uani 1 1 d . . . 
H11 H 0.2733 -0.1132 0.9039 0.035 Uiso 1 1 calc R . . 
C12 C 0.3767(3) 0.01455(17) 0.90177(15) 0.0230(5) Uani 1 1 d . . . 
H12 H 0.3804 0.0237 0.9562 0.028 Uiso 1 1 calc R . . 
C13 C 0.8588(3) 0.12067(16) 0.84930(15) 0.0196(4) Uani 1 1 d . . . 
C14 C 0.9951(3) 0.11572(18) 0.80764(16) 0.0258(5) Uani 1 1 d . . . 
H14 H 1.0733 0.0678 0.8182 0.031 Uiso 1 1 calc R . . 
C15 C 1.0165(3) 0.1803(2) 0.75126(16) 0.0287(5) Uani 1 1 d . . . 
H15 H 1.1086 0.1770 0.7222 0.034 Uiso 1 1 calc R . . 
C16 C 0.9012(3) 0.2510(2) 0.73719(15) 0.0262(5) Uani 1 1 d . . . 
H16 H 0.9139 0.2967 0.6989 0.031 Uiso 1 1 calc R . . 
C17 C 0.7677(3) 0.25270(17) 0.78044(13) 0.0202(4) Uani 1 1 d . . . 
C18 C 0.6463(3) 0.33149(19) 0.77365(14) 0.0237(5) Uani 1 1 d . . . 
H18A H 0.6678 0.3717 0.7295 0.028 Uiso 1 1 calc R . . 
H18B H 0.5340 0.3065 0.7637 0.028 Uiso 1 1 calc R . . 
C19 C 0.6603(3) 0.38742(16) 0.84726(15) 0.0209(4) Uani 1 1 d . . . 
C20 C 0.7189(3) 0.47800(18) 0.84828(17) 0.0277(5) Uani 1 1 d . . . 
H20 H 0.7431 0.5074 0.8017 0.033 Uiso 1 1 calc R . . 
C21 C 0.7411(4) 0.52398(18) 0.9178(2) 0.0322(6) Uani 1 1 d . . . 
H21 H 0.7796 0.5860 0.9200 0.039 Uiso 1 1 calc R . . 
C22 C 0.7067(4) 0.47901(18) 0.98472(17) 0.0278(5) Uani 1 1 d . . . 
H22 H 0.7226 0.5100 1.0332 0.033 Uiso 1 1 calc R . . 
C23 C 0.6488(3) 0.38839(16) 0.98119(15) 0.0203(4) Uani 1 1 d . . . 
C24 C 0.8343(4) 0.05360(19) 0.91250(18) 0.0294(5) Uani 1 1 d . . . 
H24A H 0.8128 0.0875 0.9594 0.044 Uiso 1 1 calc R . . 
H24B H 0.9330 0.0158 0.9232 0.044 Uiso 1 1 calc R . . 
H24C H 0.7411 0.0134 0.8964 0.044 Uiso 1 1 calc R . . 
C25 C 0.6148(3) 0.33804(18) 1.05325(14) 0.0240(5) Uani 1 1 d . . . 
H25A H 0.5023 0.3505 1.0645 0.036 Uiso 1 1 calc R . . 
H25B H 0.6909 0.3593 1.0967 0.036 Uiso 1 1 calc R . . 
H25C H 0.6291 0.2714 1.0458 0.036 Uiso 1 1 calc R . . 
  
loop_ 
 _atom_site_aniso_label 
 _atom_site_aniso_U_11 
 _atom_site_aniso_U_22 
 _atom_site_aniso_U_33 
 _atom_site_aniso_U_23 
 _atom_site_aniso_U_13 
 _atom_site_aniso_U_12 
Pt 0.01268(7) 0.01680(7) 0.01543(7) -0.00022(2) 0.00080(4) 0.00079(2) 
N1 0.0128(9) 0.0243(9) 0.0170(9) -0.0016(8) -0.0001(7) 0.0016(8) 
N2 0.0162(9) 0.0167(8) 0.0214(9) 0.0011(7) 0.0030(7) 0.0023(7) 
C1 0.0168(10) 0.0150(9) 0.0160(9) 0.0008(8) 0.0004(8) 0.0010(8) 
C2 0.0201(12) 0.0250(10) 0.0242(12) 0.0071(10) 0.0038(9) 0.0037(10) 
C3 0.0229(15) 0.0308(15) 0.0282(15) 0.0022(9) 0.0092(12) -0.0030(9) 
C4 0.0148(10) 0.0323(12) 0.0336(13) -0.0050(11) 0.0081(10) 0.0002(10) 
C5 0.0172(11) 0.0268(11) 0.0291(13) 0.0015(10) -0.0040(10) 0.0061(10) 
C6 0.0200(12) 0.0192(11) 0.0201(12) -0.0006(7) -0.0015(10) 0.0028(7) 
C7 0.0133(9) 0.0177(9) 0.0226(10) -0.0040(8) 0.0003(8) 0.0004(8) 
C8 0.0254(12) 0.0252(11) 0.0264(12) -0.0055(9) 0.0077(10) -0.0015(9) 
C9 0.0336(15) 0.0313(13) 0.0295(13) -0.0126(11) 0.0015(11) -0.0026(11) 
C10 0.0245(12) 0.0233(11) 0.0405(15) -0.0114(11) 0.0030(11) -0.0034(10) 
C11 0.0274(13) 0.0208(11) 0.0394(15) 0.0011(10) 0.0013(11) 0.0018(10) 
C12 0.0219(11) 0.0218(11) 0.0245(11) 0.0024(9) -0.0022(9) -0.0002(9) 
C13 0.0136(10) 0.0210(10) 0.0230(11) -0.0063(8) -0.0044(8) -0.0002(8) 
C14 0.0206(11) 0.0284(12) 0.0286(13) -0.0099(9) 0.0037(10) 0.0004(9) 
C15 0.0194(12) 0.0420(14) 0.0262(13) -0.0074(12) 0.0088(10) -0.0012(12) 
C16 0.0229(12) 0.0367(14) 0.0191(11) 0.0007(10) 0.0027(9) -0.0032(10) 
C17 0.0188(10) 0.0263(11) 0.0148(9) -0.0017(8) -0.0025(8) 0.0001(8) 
C18 0.0210(11) 0.0312(13) 0.0183(10) 0.0055(9) -0.0012(8) 0.0026(9) 
C19 0.0162(10) 0.0226(11) 0.0238(11) 0.0044(8) 0.0007(9) 0.0028(8) 
C20 0.0252(12) 0.0231(11) 0.0344(14) 0.0101(10) 0.0017(10) 0.0017(10) 
C21 0.0298(14) 0.0182(11) 0.0485(17) 0.0023(10) 0.0028(12) -0.0002(10) 
C22 0.0265(12) 0.0210(11) 0.0357(14) -0.0064(10) 0.0024(11) 0.0011(9) 
C23 0.0189(11) 0.0186(10) 0.0233(11) -0.0018(8) 0.0015(9) 0.0029(8) 
C24 0.0247(12) 0.0268(12) 0.0366(14) 0.0067(10) 0.0033(11) 0.0079(10) 
C25 0.0236(12) 0.0284(12) 0.0203(11) -0.0046(9) 0.0027(9) -0.0001(9) 
  
_geom_special_details 
; 
 All esds (except the esd in the dihedral angle between two l.s. planes) 
 are estimated using the full covariance matrix.  The cell esds are taken 
 into account individually in the estimation of esds in distances, angles 
 and torsion angles; correlations between esds in cell parameters are only 
 used when they are defined by crystal symmetry.  An approximate (isotropic) 
 treatment of cell esds is used for estimating esds involving l.s. planes. 
; 
  
loop_ 
 _geom_bond_atom_site_label_1 
 _geom_bond_atom_site_label_2 
 _geom_bond_distance 
 _geom_bond_site_symmetry_2 
 _geom_bond_publ_flag 
Pt C1 1.997(2) . ? 
Pt C7 1.998(2) . ? 
Pt N1 2.131(2) . ? 
Pt N2 2.138(2) . ? 
N1 C17 1.348(3) . ? 
N1 C13 1.357(3) . ? 
N2 C19 1.350(3) . ? 
N2 C23 1.361(3) . ? 
C1 C6 1.406(3) . ? 
C1 C2 1.408(3) . ? 
C2 C3 1.395(4) . ? 
C3 C4 1.378(4) . ? 
C4 C5 1.398(4) . ? 
C5 C6 1.379(4) . ? 
C7 C12 1.398(3) . ? 
C7 C8 1.417(4) . ? 
C8 C9 1.393(4) . ? 
C9 C10 1.389(4) . ? 
C10 C11 1.378(4) . ? 
C11 C12 1.387(4) . ? 
C13 C14 1.392(4) . ? 
C13 C24 1.491(4) . ? 
C14 C15 1.375(4) . ? 
C15 C16 1.397(4) . ? 
C16 C17 1.388(3) . ? 
C17 C18 1.510(4) . ? 
C18 C19 1.505(4) . ? 
C19 C20 1.394(3) . ? 
C20 C21 1.373(4) . ? 
C21 C22 1.382(4) . ? 
C22 C23 1.392(3) . ? 
C23 C25 1.495(3) . ? 
  
loop_ 
 _geom_angle_atom_site_label_1 
 _geom_angle_atom_site_label_2 
 _geom_angle_atom_site_label_3 
 _geom_angle 
 _geom_angle_site_symmetry_1 
 _geom_angle_site_symmetry_3 
 _geom_angle_publ_flag 
C1 Pt C7 89.02(10) . . ? 
C1 Pt N1 176.44(8) . . ? 
C7 Pt N1 92.97(9) . . ? 
C1 Pt N2 94.06(9) . . ? 
C7 Pt N2 170.48(9) . . ? 
N1 Pt N2 83.51(8) . . ? 
C17 N1 C13 119.3(2) . . ? 
C17 N1 Pt 114.93(17) . . ? 
C13 N1 Pt 125.75(18) . . ? 
C19 N2 C23 118.7(2) . . ? 
C19 N2 Pt 114.37(16) . . ? 
C23 N2 Pt 126.90(16) . . ? 
C6 C1 C2 115.5(2) . . ? 
C6 C1 Pt 120.37(19) . . ? 
C2 C1 Pt 124.11(19) . . ? 
C3 C2 C1 121.8(2) . . ? 
C4 C3 C2 120.8(3) . . ? 
C3 C4 C5 118.9(2) . . ? 
C6 C5 C4 119.8(2) . . ? 
C5 C6 C1 123.1(3) . . ? 
C12 C7 C8 115.4(2) . . ? 
C12 C7 Pt 127.18(18) . . ? 
C8 C7 Pt 117.41(18) . . ? 
C9 C8 C7 122.0(2) . . ? 
C10 C9 C8 120.3(3) . . ? 
C11 C10 C9 119.0(2) . . ? 
C10 C11 C12 120.5(3) . . ? 
C11 C12 C7 122.9(2) . . ? 
N1 C13 C14 120.8(2) . . ? 
N1 C13 C24 117.8(2) . . ? 
C14 C13 C24 121.4(2) . . ? 
C15 C14 C13 119.9(2) . . ? 
C14 C15 C16 119.2(2) . . ? 
C17 C16 C15 118.5(2) . . ? 
N1 C17 C16 122.2(2) . . ? 
N1 C17 C18 116.2(2) . . ? 
C16 C17 C18 121.5(2) . . ? 
C19 C18 C17 110.1(2) . . ? 
N2 C19 C20 122.4(2) . . ? 
N2 C19 C18 116.6(2) . . ? 
C20 C19 C18 120.8(2) . . ? 
C21 C20 C19 118.8(2) . . ? 
C20 C21 C22 119.3(3) . . ? 
C21 C22 C23 120.1(3) . . ? 
N2 C23 C22 120.6(2) . . ? 
N2 C23 C25 118.6(2) . . ? 
C22 C23 C25 120.8(2) . . ? 
  
_diffrn_measured_fraction_theta_max    0.988 
_diffrn_reflns_theta_full              32.57 
_diffrn_measured_fraction_theta_full   0.988 
_refine_diff_density_max    1.365 
_refine_diff_density_min   -2.826 
_refine_diff_density_rms    0.171 

#===END

 
data_DPEPtPh2 
  
_audit_creation_method            SHELXL-97 
_chemical_name_systematic 
; 
 ? 
; 
_chemical_name_common             ? 
_chemical_melting_point           ? 
_chemical_formula_moiety          ? 
_chemical_formula_sum 
 'C24 H22 N2 Pt' 
_chemical_formula_weight          533.53 
  
loop_ 
 _atom_type_symbol 
 _atom_type_description 
 _atom_type_scat_dispersion_real 
 _atom_type_scat_dispersion_imag 
 _atom_type_scat_source 
 'C'  'C'   0.0033   0.0016 
 'International Tables Vol C Tables 4.2.6.8 and 6.1.1.4' 
 'H'  'H'   0.0000   0.0000 
 'International Tables Vol C Tables 4.2.6.8 and 6.1.1.4' 
 'N'  'N'   0.0061   0.0033 
 'International Tables Vol C Tables 4.2.6.8 and 6.1.1.4' 
 'Pt'  'Pt'  -1.7033   8.3905 
 'International Tables Vol C Tables 4.2.6.8 and 6.1.1.4' 
  
_symmetry_cell_setting            Orthorhombic 
_symmetry_space_group_name_H-M    Pna2(1) 
  
loop_ 
 _symmetry_equiv_pos_as_xyz 
 'x, y, z' 
 '-x, -y, z+1/2' 
 'x+1/2, -y+1/2, z' 
 '-x+1/2, y+1/2, z+1/2' 
  
_cell_length_a                    9.1014(5) 
_cell_length_b                    23.4725(13) 
_cell_length_c                    8.9432(5) 
_cell_angle_alpha                 90.00 
_cell_angle_beta                  90.00 
_cell_angle_gamma                 90.00 
_cell_volume                      1910.56(18) 
_cell_formula_units_Z             4 
_cell_measurement_temperature     120(2) 
_cell_measurement_reflns_used     9144 
_cell_measurement_theta_min       4.12 
_cell_measurement_theta_max       36.78 
  
_exptl_crystal_description        plate 
_exptl_crystal_colour             colourless 
_exptl_crystal_size_max           0.43 
_exptl_crystal_size_mid           0.29 
_exptl_crystal_size_min           0.12 
_exptl_crystal_density_meas       ? 
_exptl_crystal_density_diffrn     1.855 
_exptl_crystal_density_method     'not measured' 
_exptl_crystal_F_000              1032 
_exptl_absorpt_coefficient_mu     7.355 
_exptl_absorpt_correction_type    empirical 
_exptl_absorpt_correction_T_min   0.1441 
_exptl_absorpt_correction_T_max   0.4723 
_exptl_absorpt_process_details    sadabs
  
_exptl_special_details 
; 
 ? 
; 
  
_diffrn_ambient_temperature       120(2) 
_diffrn_radiation_wavelength      0.71073 
_diffrn_radiation_type            MoK\a 
_diffrn_radiation_source          'fine-focus sealed tube' 
_diffrn_radiation_monochromator   graphite 
_diffrn_measurement_device_type   'Bruker APEX-II CCD' 
_diffrn_measurement_method        '\f and \w scans' 
_diffrn_detector_area_resol_mean  ? 
_diffrn_reflns_number             38798 
_diffrn_reflns_av_R_equivalents   0.0387 
_diffrn_reflns_av_sigmaI/netI     0.0374 
_diffrn_reflns_limit_h_min        -14 
_diffrn_reflns_limit_h_max        15 
_diffrn_reflns_limit_k_min        -39 
_diffrn_reflns_limit_k_max        38 
_diffrn_reflns_limit_l_min        -14 
_diffrn_reflns_limit_l_max        14 
_diffrn_reflns_theta_min          3.43 
_diffrn_reflns_theta_max          36.89 
_reflns_number_total              8732 
_reflns_number_gt                 8001 
_reflns_threshold_expression      >2sigma(I) 
  
_computing_data_collection        'Bruker APEX2' 
_computing_cell_refinement        'Bruker SAINT' 
_computing_data_reduction         'Bruker SAINT' 
_computing_structure_solution     'SHELXS-97 (Sheldrick, 2008)' 
_computing_structure_refinement   'SHELXL-97 (Sheldrick, 2008)' 
_computing_molecular_graphics     'Bruker SHELXTL' 
_computing_publication_material   'Bruker SHELXTL' 
  
_refine_special_details 
; 
 Refinement of F^2^ against ALL reflections.  The weighted R-factor wR and 
 goodness of fit S are based on F^2^, conventional R-factors R are based 
 on F, with F set to zero for negative F^2^. The threshold expression of 
 F^2^ > 2sigma(F^2^) is used only for calculating R-factors(gt) etc. and is 
 not relevant to the choice of reflections for refinement.  R-factors based 
 on F^2^ are statistically about twice as large as those based on F, and R- 
 factors based on ALL data will be even larger. 
; 
  
_refine_ls_structure_factor_coef  Fsqd 
_refine_ls_matrix_type            full 
_refine_ls_weighting_scheme       calc 
_refine_ls_weighting_details 
 'calc w=1/[\s^2^(Fo^2^)+(0.0000P)^2^+15.0000P] where P=(Fo^2^+2Fc^2^)/3' 
_atom_sites_solution_primary      direct 
_atom_sites_solution_secondary    difmap 
_atom_sites_solution_hydrogens    geom 
_refine_ls_hydrogen_treatment     constr 
_refine_ls_extinction_method      none 
_refine_ls_extinction_coef        ? 
_refine_ls_abs_structure_details 
 'Flack H D (1983), Acta Cryst. A39, 876-881' 
_refine_ls_abs_structure_Flack    0.104(16) 
_refine_ls_number_reflns          8732 
_refine_ls_number_parameters      245 
_refine_ls_number_restraints      1 
_refine_ls_R_factor_all           0.0548 
_refine_ls_R_factor_gt            0.0501 
_refine_ls_wR_factor_ref          0.1247 
_refine_ls_wR_factor_gt           0.1229 
_refine_ls_goodness_of_fit_ref    1.565 
_refine_ls_restrained_S_all       1.565 
_refine_ls_shift/su_max           0.002 
_refine_ls_shift/su_mean          0.000 
  
loop_ 
 _atom_site_label 
 _atom_site_type_symbol 
 _atom_site_fract_x 
 _atom_site_fract_y 
 _atom_site_fract_z 
 _atom_site_U_iso_or_equiv 
 _atom_site_adp_type 
 _atom_site_occupancy 
 _atom_site_symmetry_multiplicity 
 _atom_site_calc_flag 
 _atom_site_refinement_flags 
 _atom_site_disorder_assembly 
 _atom_site_disorder_group 
Pt Pt 0.43165(2) 0.881140(8) 0.78087(6) 0.01597(5) Uani 1 1 d . . . 
N1 N 0.2253(7) 0.9098(3) 0.8665(7) 0.0179(10) Uani 1 1 d . . . 
N2 N 0.4814(8) 0.8512(3) 0.9992(7) 0.0212(11) Uani 1 1 d . . . 
C1 C 0.6282(7) 0.8560(3) 0.7007(7) 0.0162(11) Uani 1 1 d . . . 
C2 C 0.6530(8) 0.7995(3) 0.6629(9) 0.0199(12) Uani 1 1 d . . . 
H2 H 0.5779 0.7723 0.6819 0.024 Uiso 1 1 calc R . . 
C3 C 0.7837(8) 0.7812(3) 0.5983(10) 0.0225(13) Uani 1 1 d . . . 
H3 H 0.7956 0.7424 0.5707 0.027 Uiso 1 1 calc R . . 
C4 C 0.8962(9) 0.8196(3) 0.5746(10) 0.0241(14) Uani 1 1 d . . . 
H4 H 0.9856 0.8075 0.5299 0.029 Uiso 1 1 calc R . . 
C5 C 0.8778(9) 0.8760(3) 0.6167(12) 0.0271(16) Uani 1 1 d . . . 
H5 H 0.9559 0.9024 0.6035 0.033 Uiso 1 1 calc R . . 
C6 C 0.7442(9) 0.8942(3) 0.6786(11) 0.0255(15) Uani 1 1 d . . . 
H6 H 0.7322 0.9331 0.7059 0.031 Uiso 1 1 calc R . . 
C7 C 0.3778(7) 0.9090(3) 0.5766(8) 0.0151(10) Uani 1 1 d . . . 
C8 C 0.4466(7) 0.9544(3) 0.5024(8) 0.0189(12) Uani 1 1 d . . . 
H8 H 0.5265 0.9732 0.5498 0.023 Uiso 1 1 calc R . . 
C9 C 0.4020(9) 0.9727(3) 0.3617(9) 0.0218(13) Uani 1 1 d . . . 
H9 H 0.4508 1.0034 0.3133 0.026 Uiso 1 1 calc R . . 
C10 C 0.2873(8) 0.9459(3) 0.2951(10) 0.0173(13) Uani 1 1 d . . . 
H10 H 0.2555 0.9588 0.1998 0.021 Uiso 1 1 calc R . . 
C11 C 0.2164(8) 0.9014(3) 0.3594(8) 0.0182(11) Uani 1 1 d . . . 
H11 H 0.1389 0.8825 0.3085 0.022 Uiso 1 1 calc R . . 
C12 C 0.2595(9) 0.8842(3) 0.5009(9) 0.0208(13) Uani 1 1 d . . . 
H12 H 0.2066 0.8543 0.5484 0.025 Uiso 1 1 calc R . . 
C13 C 0.2006(9) 0.9662(3) 0.8429(9) 0.0226(13) Uani 1 1 d . . . 
H13 H 0.2711 0.9873 0.7875 0.027 Uiso 1 1 calc R . . 
C14 C 0.0782(11) 0.9943(4) 0.8957(12) 0.0342(19) Uani 1 1 d . . . 
H14 H 0.0659 1.0339 0.8778 0.041 Uiso 1 1 calc R . . 
C15 C -0.0264(9) 0.9643(5) 0.9747(10) 0.0298(18) Uani 1 1 d . . . 
H15 H -0.1131 0.9824 1.0098 0.036 Uiso 1 1 calc R . . 
C16 C -0.0018(9) 0.9076(4) 1.0013(11) 0.0301(17) Uani 1 1 d . . . 
H16 H -0.0706 0.8866 1.0591 0.036 Uiso 1 1 calc R . . 
C17 C 0.1226(9) 0.8801(4) 0.9449(9) 0.0222(13) Uani 1 1 d . . . 
C18 C 0.1331(11) 0.8162(4) 0.9709(11) 0.0309(18) Uani 1 1 d . . . 
H18A H 0.0663 0.7978 0.8982 0.037 Uiso 1 1 calc R . . 
H18B H 0.0924 0.8087 1.0716 0.037 Uiso 1 1 calc R . . 
C19 C 0.2797(12) 0.7853(3) 0.9614(10) 0.0306(18) Uani 1 1 d . . . 
H19A H 0.2644 0.7450 0.9902 0.037 Uiso 1 1 calc R . . 
H19B H 0.3133 0.7857 0.8562 0.037 Uiso 1 1 calc R . . 
C20 C 0.3977(10) 0.8095(3) 1.0569(9) 0.0250(15) Uani 1 1 d . . . 
C21 C 0.4208(14) 0.7909(5) 1.2049(11) 0.041(3) Uani 1 1 d . . . 
H21 H 0.3613 0.7612 1.2441 0.050 Uiso 1 1 calc R . . 
C22 C 0.5290(14) 0.8151(5) 1.2950(14) 0.048(3) Uani 1 1 d . . . 
H22 H 0.5433 0.8035 1.3957 0.057 Uiso 1 1 calc R . . 
C23 C 0.6154(14) 0.8575(6) 1.2287(11) 0.045(3) Uani 1 1 d . . . 
H23 H 0.6930 0.8745 1.2839 0.055 Uiso 1 1 calc R . . 
C24 C 0.5883(11) 0.8749(4) 1.0814(12) 0.034(2) Uani 1 1 d . . . 
H24 H 0.6469 0.9042 1.0389 0.040 Uiso 1 1 calc R . . 
  
loop_ 
 _atom_site_aniso_label 
 _atom_site_aniso_U_11 
 _atom_site_aniso_U_22 
 _atom_site_aniso_U_33 
 _atom_site_aniso_U_23 
 _atom_site_aniso_U_13 
 _atom_site_aniso_U_12 
Pt 0.01414(8) 0.01951(8) 0.01425(8) 0.00079(18) -0.00276(18) 0.00028(7) 
N1 0.011(2) 0.026(3) 0.016(2) 0.001(2) -0.0075(19) -0.0003(19) 
N2 0.021(3) 0.026(3) 0.017(3) 0.000(2) 0.000(2) 0.006(2) 
C1 0.014(3) 0.022(3) 0.012(2) 0.001(2) -0.010(2) 0.001(2) 
C2 0.014(3) 0.020(3) 0.026(3) 0.000(2) -0.006(3) -0.001(2) 
C3 0.017(3) 0.021(3) 0.030(4) -0.004(3) -0.003(3) 0.003(2) 
C4 0.023(3) 0.025(3) 0.024(4) -0.001(3) 0.001(3) 0.006(3) 
C5 0.016(3) 0.022(3) 0.043(5) 0.002(3) 0.002(3) -0.001(2) 
C6 0.018(3) 0.017(3) 0.041(5) -0.004(3) -0.003(3) 0.001(2) 
C7 0.008(2) 0.019(2) 0.018(3) 0.001(2) 0.003(2) 0.0014(19) 
C8 0.008(3) 0.032(3) 0.017(3) 0.001(2) 0.001(2) -0.004(2) 
C9 0.024(4) 0.026(3) 0.016(3) 0.005(2) 0.001(2) 0.000(2) 
C10 0.025(3) 0.025(2) 0.002(3) 0.001(2) 0.004(2) 0.003(2) 
C11 0.012(3) 0.026(3) 0.017(3) -0.002(2) -0.006(2) 0.001(2) 
C12 0.022(3) 0.017(3) 0.023(3) 0.003(2) -0.001(3) 0.001(2) 
C13 0.019(3) 0.026(3) 0.023(3) 0.001(3) 0.007(3) 0.002(2) 
C14 0.036(5) 0.030(4) 0.037(5) 0.000(3) -0.004(4) 0.010(3) 
C15 0.007(3) 0.057(6) 0.025(4) 0.002(4) 0.003(3) 0.009(3) 
C16 0.015(3) 0.047(5) 0.029(4) 0.006(4) 0.003(3) -0.001(3) 
C17 0.017(3) 0.033(4) 0.017(3) 0.001(3) -0.003(2) 0.000(3) 
C18 0.032(5) 0.032(4) 0.029(4) 0.003(3) 0.010(4) -0.008(3) 
C19 0.047(5) 0.021(3) 0.024(4) 0.003(3) 0.006(4) -0.002(3) 
C20 0.031(4) 0.027(3) 0.017(3) 0.003(3) 0.006(3) 0.011(3) 
C21 0.057(7) 0.047(5) 0.019(4) 0.013(4) 0.003(4) 0.023(5) 
C22 0.063(6) 0.075(6) 0.005(5) 0.001(4) -0.004(4) 0.039(5) 
C23 0.044(6) 0.069(7) 0.023(4) -0.015(5) -0.016(4) 0.028(5) 
C24 0.029(5) 0.042(5) 0.029(4) -0.009(4) -0.008(3) 0.011(4) 
  
_geom_special_details 
; 
 All esds (except the esd in the dihedral angle between two l.s. planes) 
 are estimated using the full covariance matrix.  The cell esds are taken 
 into account individually in the estimation of esds in distances, angles 
 and torsion angles; correlations between esds in cell parameters are only 
 used when they are defined by crystal symmetry.  An approximate (isotropic) 
 treatment of cell esds is used for estimating esds involving l.s. planes. 
; 
  
loop_ 
 _geom_bond_atom_site_label_1 
 _geom_bond_atom_site_label_2 
 _geom_bond_distance 
 _geom_bond_site_symmetry_2 
 _geom_bond_publ_flag 
Pt C7 2.002(7) . ? 
Pt C1 2.016(7) . ? 
Pt N2 2.124(7) . ? 
Pt N1 2.137(6) . ? 
N1 C13 1.360(10) . ? 
N1 C17 1.361(10) . ? 
N2 C24 1.342(12) . ? 
N2 C20 1.343(11) . ? 
C1 C2 1.386(10) . ? 
C1 C6 1.400(11) . ? 
C2 C3 1.391(11) . ? 
C3 C4 1.380(12) . ? 
C4 C5 1.386(11) . ? 
C5 C6 1.403(12) . ? 
C7 C12 1.399(11) . ? 
C7 C8 1.402(10) . ? 
C8 C9 1.390(10) . ? 
C9 C10 1.356(11) . ? 
C10 C11 1.355(10) . ? 
C11 C12 1.385(10) . ? 
C13 C14 1.378(12) . ? 
C14 C15 1.379(14) . ? 
C15 C16 1.369(14) . ? 
C16 C17 1.397(12) . ? 
C17 C18 1.520(12) . ? 
C18 C19 1.522(14) . ? 
C19 C20 1.486(14) . ? 
C20 C21 1.410(12) . ? 
C21 C22 1.394(18) . ? 
C22 C23 1.399(19) . ? 
C23 C24 1.401(15) . ? 
  
loop_ 
 _geom_angle_atom_site_label_1 
 _geom_angle_atom_site_label_2 
 _geom_angle_atom_site_label_3 
 _geom_angle 
 _geom_angle_site_symmetry_1 
 _geom_angle_site_symmetry_3 
 _geom_angle_publ_flag 
C7 Pt C1 89.3(3) . . ? 
C7 Pt N2 178.1(3) . . ? 
C1 Pt N2 92.4(3) . . ? 
C7 Pt N1 90.5(2) . . ? 
C1 Pt N1 178.6(3) . . ? 
N2 Pt N1 87.8(2) . . ? 
C13 N1 C17 117.7(7) . . ? 
C13 N1 Pt 113.4(5) . . ? 
C17 N1 Pt 128.8(5) . . ? 
C24 N2 C20 120.2(8) . . ? 
C24 N2 Pt 121.4(7) . . ? 
C20 N2 Pt 118.3(6) . . ? 
C2 C1 C6 117.2(7) . . ? 
C2 C1 Pt 120.7(5) . . ? 
C6 C1 Pt 122.1(5) . . ? 
C1 C2 C3 122.4(7) . . ? 
C4 C3 C2 119.8(7) . . ? 
C3 C4 C5 119.5(8) . . ? 
C4 C5 C6 120.3(8) . . ? 
C1 C6 C5 120.8(7) . . ? 
C12 C7 C8 115.5(6) . . ? 
C12 C7 Pt 119.6(5) . . ? 
C8 C7 Pt 124.8(5) . . ? 
C9 C8 C7 122.2(7) . . ? 
C10 C9 C8 118.6(7) . . ? 
C11 C10 C9 122.5(8) . . ? 
C10 C11 C12 118.6(7) . . ? 
C11 C12 C7 122.5(7) . . ? 
N1 C13 C14 123.1(8) . . ? 
C13 C14 C15 119.3(8) . . ? 
C16 C15 C14 118.2(8) . . ? 
C15 C16 C17 121.2(8) . . ? 
N1 C17 C16 120.4(8) . . ? 
N1 C17 C18 122.7(7) . . ? 
C16 C17 C18 116.8(8) . . ? 
C17 C18 C19 121.2(7) . . ? 
C20 C19 C18 114.8(7) . . ? 
N2 C20 C21 120.2(10) . . ? 
N2 C20 C19 117.9(7) . . ? 
C21 C20 C19 121.9(9) . . ? 
C22 C21 C20 121.4(11) . . ? 
C21 C22 C23 116.3(10) . . ? 
C22 C23 C24 120.5(11) . . ? 
N2 C24 C23 121.4(11) . . ? 
  
loop_ 
 _geom_torsion_atom_site_label_1 
 _geom_torsion_atom_site_label_2 
 _geom_torsion_atom_site_label_3 
 _geom_torsion_atom_site_label_4 
 _geom_torsion 
 _geom_torsion_site_symmetry_1 
 _geom_torsion_site_symmetry_2 
 _geom_torsion_site_symmetry_3 
 _geom_torsion_site_symmetry_4 
 _geom_torsion_publ_flag 
C7 Pt N1 C13 -56.7(6) . . . . ? 
C1 Pt N1 C13 27(10) . . . . ? 
N2 Pt N1 C13 124.2(6) . . . . ? 
C7 Pt N1 C17 126.5(6) . . . . ? 
C1 Pt N1 C17 -150(10) . . . . ? 
N2 Pt N1 C17 -52.6(6) . . . . ? 
C7 Pt N2 C24 -141(8) . . . . ? 
C1 Pt N2 C24 65.9(7) . . . . ? 
N1 Pt N2 C24 -112.7(7) . . . . ? 
C7 Pt N2 C20 36(8) . . . . ? 
C1 Pt N2 C20 -117.6(6) . . . . ? 
N1 Pt N2 C20 63.8(6) . . . . ? 
C7 Pt C1 C2 -99.1(6) . . . . ? 
N2 Pt C1 C2 80.0(6) . . . . ? 
N1 Pt C1 C2 177(89) . . . . ? 
C7 Pt C1 C6 80.0(7) . . . . ? 
N2 Pt C1 C6 -100.9(7) . . . . ? 
N1 Pt C1 C6 -4(10) . . . . ? 
C6 C1 C2 C3 -3.4(11) . . . . ? 
Pt C1 C2 C3 175.8(6) . . . . ? 
C1 C2 C3 C4 2.3(12) . . . . ? 
C2 C3 C4 C5 0.5(13) . . . . ? 
C3 C4 C5 C6 -2.0(14) . . . . ? 
C2 C1 C6 C5 1.8(12) . . . . ? 
Pt C1 C6 C5 -177.3(7) . . . . ? 
C4 C5 C6 C1 0.8(14) . . . . ? 
C1 Pt C7 C12 117.0(6) . . . . ? 
N2 Pt C7 C12 -36(8) . . . . ? 
N1 Pt C7 C12 -64.4(6) . . . . ? 
C1 Pt C7 C8 -65.8(6) . . . . ? 
N2 Pt C7 C8 141(8) . . . . ? 
N1 Pt C7 C8 112.8(6) . . . . ? 
C12 C7 C8 C9 -1.1(10) . . . . ? 
Pt C7 C8 C9 -178.4(6) . . . . ? 
C7 C8 C9 C10 0.4(12) . . . . ? 
C8 C9 C10 C11 -1.1(12) . . . . ? 
C9 C10 C11 C12 2.5(11) . . . . ? 
C10 C11 C12 C7 -3.3(11) . . . . ? 
C8 C7 C12 C11 2.6(10) . . . . ? 
Pt C7 C12 C11 180.0(6) . . . . ? 
C17 N1 C13 C14 0.7(12) . . . . ? 
Pt N1 C13 C14 -176.5(7) . . . . ? 
N1 C13 C14 C15 -0.9(14) . . . . ? 
C13 C14 C15 C16 1.8(14) . . . . ? 
C14 C15 C16 C17 -2.6(14) . . . . ? 
C13 N1 C17 C16 -1.4(11) . . . . ? 
Pt N1 C17 C16 175.2(6) . . . . ? 
C13 N1 C17 C18 176.4(8) . . . . ? 
Pt N1 C17 C18 -6.9(11) . . . . ? 
C15 C16 C17 N1 2.5(13) . . . . ? 
C15 C16 C17 C18 -175.4(9) . . . . ? 
N1 C17 C18 C19 22.1(13) . . . . ? 
C16 C17 C18 C19 -160.0(8) . . . . ? 
C17 C18 C19 C20 53.6(11) . . . . ? 
C24 N2 C20 C21 0.6(12) . . . . ? 
Pt N2 C20 C21 -175.9(6) . . . . ? 
C24 N2 C20 C19 179.2(8) . . . . ? 
Pt N2 C20 C19 2.7(9) . . . . ? 
C18 C19 C20 N2 -88.2(9) . . . . ? 
C18 C19 C20 C21 90.4(10) . . . . ? 
N2 C20 C21 C22 0.5(14) . . . . ? 
C19 C20 C21 C22 -178.0(9) . . . . ? 
C20 C21 C22 C23 -1.9(14) . . . . ? 
C21 C22 C23 C24 2.2(14) . . . . ? 
C20 N2 C24 C23 -0.3(13) . . . . ? 
Pt N2 C24 C23 176.2(7) . . . . ? 
C22 C23 C24 N2 -1.2(15) . . . . ? 
  
_diffrn_measured_fraction_theta_max    0.948 
_diffrn_reflns_theta_full              36.89 
_diffrn_measured_fraction_theta_full   0.948 
_refine_diff_density_max    4.476 
_refine_diff_density_min   -3.765 
_refine_diff_density_rms    0.284 

#===END

 
data_DPEPtPhTHFBAr4
  
_audit_creation_method            SHELXL-97 
_chemical_name_systematic 
; 
 ? 
; 
_chemical_name_common             ? 
_chemical_melting_point           ? 
_chemical_formula_moiety          ? 
_chemical_formula_sum 
 'C54 H37 B F24 N2 O Pt' 
_chemical_formula_weight          1391.76 
  
loop_ 
 _atom_type_symbol 
 _atom_type_description 
 _atom_type_scat_dispersion_real 
 _atom_type_scat_dispersion_imag 
 _atom_type_scat_source 
 'C'  'C'   0.0033   0.0016 
 'International Tables Vol C Tables 4.2.6.8 and 6.1.1.4' 
 'H'  'H'   0.0000   0.0000 
 'International Tables Vol C Tables 4.2.6.8 and 6.1.1.4' 
 'B'  'B'   0.0013   0.0007 
 'International Tables Vol C Tables 4.2.6.8 and 6.1.1.4' 
 'N'  'N'   0.0061   0.0033 
 'International Tables Vol C Tables 4.2.6.8 and 6.1.1.4' 
 'O'  'O'   0.0106   0.0060 
 'International Tables Vol C Tables 4.2.6.8 and 6.1.1.4' 
 'F'  'F'   0.0171   0.0103 
 'International Tables Vol C Tables 4.2.6.8 and 6.1.1.4' 
 'Pt'  'Pt'  -1.7033   8.3905 
 'International Tables Vol C Tables 4.2.6.8 and 6.1.1.4' 
  
_symmetry_cell_setting            Monoclinic 
_symmetry_space_group_name_H-M    I2/a 
  
loop_ 
 _symmetry_equiv_pos_as_xyz 
 'x, y, z' 
 '-x+1/2, y, -z' 
 'x+1/2, y+1/2, z+1/2' 
 '-x+1, y+1/2, -z+1/2' 
 '-x, -y, -z' 
 'x-1/2, -y, z' 
 '-x+1/2, -y+1/2, -z+1/2' 
 'x, -y+1/2, z+1/2' 
  
_cell_length_a                    25.455(5) 
_cell_length_b                    16.5463(18) 
_cell_length_c                    29.806(3) 
_cell_angle_alpha                 90.00 
_cell_angle_beta                  115.220(2) 
_cell_angle_gamma                 90.00 
_cell_volume                      11357(3) 
_cell_formula_units_Z             8 
_cell_measurement_temperature     153(2) 
_cell_measurement_reflns_used     9913 
_cell_measurement_theta_min       3.46 
_cell_measurement_theta_max       28.00 
  
_exptl_crystal_description        needle 
_exptl_crystal_colour             colourless 
_exptl_crystal_size_max           0.46 
_exptl_crystal_size_mid           0.16 
_exptl_crystal_size_min           0.16 
_exptl_crystal_density_meas       'not measured' 
_exptl_crystal_density_diffrn     1.628 
_exptl_crystal_density_method     'not measured' 
_exptl_crystal_F_000              5456 
_exptl_absorpt_coefficient_mu     2.589 
_exptl_absorpt_correction_type    empirical 
_exptl_absorpt_correction_T_min   0.3822 
_exptl_absorpt_correction_T_max   0.6821 
_exptl_absorpt_process_details    'Bruker SADABS' 
  
_exptl_special_details 
; 
 ? 
; 
  
_diffrn_ambient_temperature       153(2) 
_diffrn_radiation_wavelength      0.71073 
_diffrn_radiation_type            MoK\a 
_diffrn_radiation_source          'fine-focus sealed tube' 
_diffrn_radiation_monochromator   graphite 
_diffrn_measurement_device_type   'Bruker APEX-II CCD' 
_diffrn_measurement_method        '\f and \w scans' 
_diffrn_detector_area_resol_mean  ? 
_diffrn_reflns_number             89254 
_diffrn_reflns_av_R_equivalents   0.0350 
_diffrn_reflns_av_sigmaI/netI     0.0219 
_diffrn_reflns_limit_h_min        -33 
_diffrn_reflns_limit_h_max        33 
_diffrn_reflns_limit_k_min        -21 
_diffrn_reflns_limit_k_max        21 
_diffrn_reflns_limit_l_min        -39 
_diffrn_reflns_limit_l_max        39 
_diffrn_reflns_theta_min          3.30 
_diffrn_reflns_theta_max          28.01 
_reflns_number_total              13693 
_reflns_number_gt                 11017 
_reflns_threshold_expression      >2sigma(I) 
  
_computing_data_collection        'Bruker APEX2' 
_computing_cell_refinement        'Bruker SAINT' 
_computing_data_reduction         'Bruker SAINT' 
_computing_structure_solution     'SHELXS-97 (Sheldrick, 2008)' 
_computing_structure_refinement   'SHELXL-97 (Sheldrick, 2008)' 
_computing_molecular_graphics     'Bruker SHELXTL' 
_computing_publication_material   'Bruker SHELXTL' 
  
_refine_special_details 
; 
 Refinement of F^2^ against ALL reflections.  The weighted R-factor wR and 
 goodness of fit S are based on F^2^, conventional R-factors R are based 
 on F, with F set to zero for negative F^2^. The threshold expression of 
 F^2^ > 2sigma(F^2^) is used only for calculating R-factors(gt) etc. and is 
 not relevant to the choice of reflections for refinement.  R-factors based 
 on F^2^ are statistically about twice as large as those based on F, and R- 
 factors based on ALL data will be even larger. 
; 
  
_refine_ls_structure_factor_coef  Fsqd 
_refine_ls_matrix_type            full 
_refine_ls_weighting_scheme       calc 
_refine_ls_weighting_details 
 'calc w=1/[\s^2^(Fo^2^)+(0.0000P)^2^+0.0000P] where P=(Fo^2^+2Fc^2^)/3' 
_atom_sites_solution_primary      direct 
_atom_sites_solution_secondary    difmap 
_atom_sites_solution_hydrogens    geom 
_refine_ls_hydrogen_treatment     constr
_refine_ls_extinction_method      none 
_refine_ls_extinction_coef        0 
_refine_ls_number_reflns          13693 
_refine_ls_number_parameters      748 
_refine_ls_number_restraints      0 
_refine_ls_R_factor_all           0.0621 
_refine_ls_R_factor_gt            0.0468 
_refine_ls_wR_factor_ref          0.1493 
_refine_ls_wR_factor_gt           0.1339 
_refine_ls_goodness_of_fit_ref    1.042 
_refine_ls_restrained_S_all       1.042 
_refine_ls_shift/su_max           0.001 
_refine_ls_shift/su_mean          0.000 
  
loop_ 
 _atom_site_label 
 _atom_site_type_symbol 
 _atom_site_fract_x 
 _atom_site_fract_y 
 _atom_site_fract_z 
 _atom_site_U_iso_or_equiv 
 _atom_site_adp_type 
 _atom_site_occupancy 
 _atom_site_symmetry_multiplicity 
 _atom_site_calc_flag 
 _atom_site_refinement_flags 
 _atom_site_disorder_assembly 
 _atom_site_disorder_group 
Pt1 Pt 0.178822(8) 0.017732(11) 0.627641(7) 0.03219(8) Uani 1 1 d . . . 
F1 F 0.0518(5) 0.4344(7) 0.5127(3) 0.202(6) Uani 1 1 d . . . 
F2 F 0.0486(5) 0.3212(8) 0.4907(4) 0.220(6) Uani 1 1 d . . . 
F3 F 0.1243(3) 0.3632(7) 0.5399(2) 0.160(4) Uani 1 1 d . . . 
F4 F 0.2296(3) 0.3088(5) 0.4391(3) 0.147(3) Uani 1 1 d . . . 
F5 F 0.1788(2) 0.3178(4) 0.3604(2) 0.1056(19) Uani 1 1 d . . . 
F6 F 0.2314(2) 0.4083(4) 0.3965(3) 0.1049(19) Uani 1 1 d . . . 
F7 F -0.1306(3) 0.7568(4) 0.3586(3) 0.131(3) Uani 1 1 d . . . 
F8 F -0.2052(4) 0.6923(4) 0.3345(5) 0.202(5) Uani 1 1 d . . . 
F9 F -0.1736(4) 0.7394(5) 0.2860(3) 0.169(4) Uani 1 1 d . . . 
F10 F -0.1142(2) 0.3466(3) 0.3557(2) 0.0970(19) Uani 1 1 d . . . 
F11 F -0.1682(4) 0.3695(4) 0.2831(3) 0.179(5) Uani 1 1 d . . . 
F12 F -0.1937(3) 0.4016(4) 0.3393(4) 0.153(4) Uani 1 1 d . . . 
F13 F -0.0295(2) 0.7613(2) 0.20053(15) 0.0696(12) Uani 1 1 d . . . 
F14 F 0.0423(2) 0.7340(3) 0.1839(2) 0.0907(16) Uani 1 1 d . . . 
F15 F -0.0428(2) 0.6962(3) 0.13542(13) 0.0699(11) Uani 1 1 d . . . 
F16 F -0.0316(4) 0.3630(6) 0.1830(5) 0.240(7) Uani 1 1 d . . . 
F17 F 0.0178(8) 0.4065(4) 0.1529(3) 0.278(9) Uani 1 1 d . . . 
F18 F 0.0487(5) 0.3515(4) 0.2186(3) 0.156(4) Uani 1 1 d . . . 
F19 F 0.1630(3) 0.8162(6) 0.3342(3) 0.155(3) Uani 1 1 d . . . 
F20 F 0.2168(3) 0.7229(4) 0.3663(3) 0.117(2) Uani 1 1 d . . . 
F21 F 0.2222(3) 0.8259(5) 0.4085(3) 0.153(4) Uani 1 1 d . . . 
F22 F 0.0708(4) 0.7246(4) 0.5099(2) 0.129(3) Uani 1 1 d . . . 
F23 F 0.1145(5) 0.8239(8) 0.5094(4) 0.260(8) Uani 1 1 d . . . 
F24 F 0.0298(6) 0.8151(8) 0.4660(3) 0.240(7) Uani 1 1 d . . . 
O1 O 0.26088(15) 0.0639(2) 0.66432(14) 0.0389(8) Uani 1 1 d . . . 
N1 N 0.18217(18) -0.0161(2) 0.69814(16) 0.0330(8) Uani 1 1 d . . . 
N2 N 0.10151(18) -0.0343(3) 0.59659(15) 0.0368(9) Uani 1 1 d . . . 
C1 C 0.1848(2) 0.0472(4) 0.7277(2) 0.0403(11) Uani 1 1 d . . . 
H1 H 0.1887 0.1002 0.7173 0.048 Uiso 1 1 calc R . . 
C2 C 0.1821(3) 0.0371(4) 0.7723(2) 0.0504(14) Uani 1 1 d . . . 
H2 H 0.1847 0.0826 0.7926 0.060 Uiso 1 1 calc R . . 
C3 C 0.1756(3) -0.0387(4) 0.7874(2) 0.0518(14) Uani 1 1 d . . . 
H3 H 0.1741 -0.0469 0.8183 0.062 Uiso 1 1 calc R . . 
C4 C 0.1713(3) -0.1019(4) 0.7571(2) 0.0478(13) Uani 1 1 d . . . 
H4 H 0.1654 -0.1547 0.7664 0.057 Uiso 1 1 calc R . . 
C5 C 0.1756(2) -0.0907(3) 0.71270(19) 0.0371(10) Uani 1 1 d . . . 
C6 C 0.1751(3) -0.1650(3) 0.6831(2) 0.0511(14) Uani 1 1 d . . . 
H6A H 0.1506 -0.2060 0.6893 0.061 Uiso 1 1 calc R . . 
H6B H 0.2152 -0.1866 0.6970 0.061 Uiso 1 1 calc R . . 
C7 C 0.1542(3) -0.1590(3) 0.6266(2) 0.0487(13) Uani 1 1 d . . . 
H7A H 0.1844 -0.1313 0.6196 0.058 Uiso 1 1 calc R . . 
H7B H 0.1495 -0.2143 0.6127 0.058 Uiso 1 1 calc R . . 
C8 C 0.0989(3) -0.1151(4) 0.60130(19) 0.0424(12) Uani 1 1 d . . . 
C9 C 0.0445(3) -0.1531(5) 0.5819(2) 0.0600(19) Uani 1 1 d . . . 
H9 H 0.0420 -0.2099 0.5851 0.072 Uiso 1 1 calc R . . 
C10 C -0.0048(3) -0.1088(6) 0.5584(2) 0.071(2) Uani 1 1 d . . . 
H10 H -0.0416 -0.1348 0.5449 0.085 Uiso 1 1 calc R . . 
C11 C -0.0014(3) -0.0269(6) 0.5543(2) 0.067(2) Uani 1 1 d . . . 
H11 H -0.0358 0.0041 0.5380 0.080 Uiso 1 1 calc R . . 
C12 C 0.0528(3) 0.0112(5) 0.5741(2) 0.0491(15) Uani 1 1 d . . . 
H12 H 0.0555 0.0682 0.5719 0.059 Uiso 1 1 calc R . . 
C13 C 0.1728(2) 0.0509(3) 0.56107(18) 0.0340(10) Uani 1 1 d . . . 
C14 C 0.1803(3) -0.0057(4) 0.5298(3) 0.0543(15) Uani 1 1 d . . . 
H14 H 0.1884 -0.0604 0.5402 0.065 Uiso 1 1 calc R . . 
C15 C 0.1759(4) 0.0169(5) 0.4833(3) 0.070(2) Uani 1 1 d . . . 
H15 H 0.1799 -0.0230 0.4621 0.084 Uiso 1 1 calc R . . 
C16 C 0.1661(3) 0.0942(5) 0.4677(3) 0.0636(19) Uani 1 1 d . . . 
H16 H 0.1642 0.1091 0.4363 0.076 Uiso 1 1 calc R . . 
C17 C 0.1590(4) 0.1496(5) 0.4974(3) 0.071(2) Uani 1 1 d . . . 
H17 H 0.1517 0.2042 0.4866 0.085 Uiso 1 1 calc R . . 
C18 C 0.1621(3) 0.1291(4) 0.5440(3) 0.0608(17) Uani 1 1 d . . . 
H18 H 0.1568 0.1698 0.5642 0.073 Uiso 1 1 calc R . . 
C19 C 0.3076(3) 0.0073(5) 0.6774(5) 0.093(4) Uani 1 1 d . . . 
H19A H 0.3078 -0.0295 0.7036 0.111 Uiso 1 1 calc R . . 
H19B H 0.3026 -0.0256 0.6481 0.111 Uiso 1 1 calc R . . 
C20 C 0.3609(3) 0.0510(5) 0.6947(4) 0.074(2) Uani 1 1 d . . . 
H20A H 0.3848 0.0316 0.6780 0.089 Uiso 1 1 calc R . . 
H20B H 0.3833 0.0434 0.7309 0.089 Uiso 1 1 calc R . . 
C21 C 0.3459(3) 0.1372(5) 0.6831(3) 0.070(2) Uani 1 1 d . . . 
H21A H 0.3653 0.1592 0.6632 0.084 Uiso 1 1 calc R . . 
H21B H 0.3583 0.1691 0.7141 0.084 Uiso 1 1 calc R . . 
C22 C 0.2810(3) 0.1408(4) 0.6542(4) 0.083(3) Uani 1 1 d . . . 
H22A H 0.2645 0.1863 0.6656 0.100 Uiso 1 1 calc R . . 
H22B H 0.2701 0.1472 0.6184 0.100 Uiso 1 1 calc R . . 
C111 C 0.0673(2) 0.4872(3) 0.38225(18) 0.0299(9) Uani 1 1 d . . . 
C112 C 0.0584(2) 0.4660(3) 0.4241(2) 0.0395(11) Uani 1 1 d . . . 
H112 H 0.0276 0.4907 0.4291 0.047 Uiso 1 1 calc R . . 
C113 C 0.0933(3) 0.4099(4) 0.4584(2) 0.0506(14) Uani 1 1 d . . . 
C114 C 0.1391(3) 0.3741(4) 0.4532(3) 0.0534(15) Uani 1 1 d . . . 
H114 H 0.1637 0.3367 0.4772 0.064 Uiso 1 1 calc R . . 
C115 C 0.1483(2) 0.3937(3) 0.4124(2) 0.0435(12) Uani 1 1 d . . . 
C116 C 0.1135(2) 0.4496(3) 0.37844(19) 0.0355(10) Uani 1 1 d . . . 
H116 H 0.1217 0.4629 0.3511 0.043 Uiso 1 1 calc R . . 
C117 C 0.0815(4) 0.3889(8) 0.5025(4) 0.104(4) Uani 1 1 d . . . 
C118 C 0.1964(3) 0.3543(5) 0.4046(3) 0.0602(17) Uani 1 1 d . . . 
C121 C -0.03718(19) 0.5599(3) 0.34017(16) 0.0277(8) Uani 1 1 d . . . 
C122 C -0.0702(2) 0.6298(3) 0.33636(18) 0.0325(9) Uani 1 1 d . . . 
H122 H -0.0533 0.6814 0.3375 0.039 Uiso 1 1 calc R . . 
C123 C -0.1268(2) 0.6251(3) 0.3309(2) 0.0415(12) Uani 1 1 d . . . 
C124 C -0.1534(2) 0.5524(4) 0.3292(2) 0.0477(13) Uani 1 1 d . . . 
H124 H -0.1917 0.5498 0.3269 0.057 Uiso 1 1 calc R . . 
C125 C -0.1223(2) 0.4828(3) 0.3308(3) 0.0478(14) Uani 1 1 d . . . 
C126 C -0.0656(2) 0.4868(3) 0.3365(2) 0.0372(11) Uani 1 1 d . . . 
H126 H -0.0453 0.4379 0.3381 0.045 Uiso 1 1 calc R . . 
C127 C -0.1599(3) 0.7008(4) 0.3271(3) 0.0639(19) Uani 1 1 d . . . 
C128 C -0.1490(3) 0.4004(5) 0.3271(4) 0.079(3) Uani 1 1 d . . . 
C131 C 0.02373(18) 0.5568(3) 0.28941(16) 0.0271(8) Uani 1 1 d . . . 
C132 C 0.0133(2) 0.6277(3) 0.26096(17) 0.0311(9) Uani 1 1 d . . . 
H132 H 0.0126 0.6781 0.2760 0.037 Uiso 1 1 calc R . . 
C133 C 0.0038(2) 0.6266(3) 0.21147(18) 0.0355(10) Uani 1 1 d . . . 
C134 C 0.0039(2) 0.5554(4) 0.18803(19) 0.0408(11) Uani 1 1 d . . . 
H134 H -0.0022 0.5546 0.1543 0.049 Uiso 1 1 calc R . . 
C135 C 0.0132(2) 0.4839(3) 0.2153(2) 0.0379(11) Uani 1 1 d . . . 
C136 C 0.0225(2) 0.4848(3) 0.26437(19) 0.0325(10) Uani 1 1 d . . . 
H136 H 0.0284 0.4350 0.2817 0.039 Uiso 1 1 calc R . . 
C137 C -0.0058(3) 0.7038(4) 0.1837(2) 0.0453(13) Uani 1 1 d . . . 
C138 C 0.0116(3) 0.4049(4) 0.1899(3) 0.0589(17) Uani 1 1 d . . . 
C141 C 0.0651(2) 0.6430(3) 0.37441(16) 0.0289(9) Uani 1 1 d . . . 
C142 C 0.1091(2) 0.6773(3) 0.36447(18) 0.0335(10) Uani 1 1 d . . . 
H142 H 0.1169 0.6554 0.3385 0.040 Uiso 1 1 calc R . . 
C143 C 0.1418(2) 0.7421(3) 0.3912(2) 0.0421(12) Uani 1 1 d . . . 
C144 C 0.1319(3) 0.7763(4) 0.4289(2) 0.0503(14) Uani 1 1 d . . . 
H144 H 0.1538 0.8216 0.4467 0.060 Uiso 1 1 calc R . . 
C145 C 0.0892(3) 0.7431(4) 0.4402(2) 0.0491(14) Uani 1 1 d . . . 
C146 C 0.0571(2) 0.6776(3) 0.41354(18) 0.0377(11) Uani 1 1 d . . . 
H146 H 0.0283 0.6554 0.4223 0.045 Uiso 1 1 calc R . . 
C147 C 0.1863(4) 0.7776(5) 0.3772(3) 0.069(2) Uani 1 1 d . . . 
C148 C 0.0767(5) 0.7779(5) 0.4809(3) 0.079(3) Uani 1 1 d . . . 
B1 B 0.0300(2) 0.5614(3) 0.34599(18) 0.0268(9) Uani 1 1 d . . . 
  
loop_ 
 _atom_site_aniso_label 
 _atom_site_aniso_U_11 
 _atom_site_aniso_U_22 
 _atom_site_aniso_U_33 
 _atom_site_aniso_U_23 
 _atom_site_aniso_U_13 
 _atom_site_aniso_U_12 
Pt1 0.03358(11) 0.02888(11) 0.03529(11) 0.00147(7) 0.01579(8) -0.00091(7) 
F1 0.308(12) 0.234(10) 0.174(7) 0.144(8) 0.208(9) 0.181(10) 
F2 0.264(12) 0.250(12) 0.199(10) 0.042(9) 0.150(10) -0.116(11) 
F3 0.127(5) 0.272(11) 0.097(4) 0.109(6) 0.063(4) 0.072(6) 
F4 0.137(5) 0.197(7) 0.136(5) 0.106(5) 0.088(4) 0.136(6) 
F5 0.092(4) 0.108(4) 0.120(4) -0.028(4) 0.048(3) 0.033(3) 
F6 0.070(3) 0.112(4) 0.156(5) 0.001(4) 0.071(4) 0.017(3) 
F7 0.113(5) 0.079(4) 0.178(7) -0.047(4) 0.039(5) 0.036(3) 
F8 0.155(6) 0.067(4) 0.493(17) 0.030(7) 0.242(10) 0.039(4) 
F9 0.244(9) 0.128(6) 0.122(5) 0.045(5) 0.065(6) 0.146(7) 
F10 0.065(3) 0.043(2) 0.167(5) 0.033(3) 0.033(3) -0.009(2) 
F11 0.237(9) 0.087(4) 0.127(6) -0.008(4) -0.006(6) -0.109(6) 
F12 0.081(4) 0.083(4) 0.326(11) 0.043(6) 0.115(6) -0.010(3) 
F13 0.122(4) 0.0439(19) 0.060(2) 0.0117(17) 0.054(2) 0.022(2) 
F14 0.073(3) 0.087(3) 0.119(4) 0.047(3) 0.048(3) -0.006(3) 
F15 0.092(3) 0.075(3) 0.0379(18) 0.0128(18) 0.0239(19) 0.018(2) 
F16 0.127(6) 0.172(8) 0.438(18) -0.242(11) 0.136(9) -0.084(6) 
F17 0.74(3) 0.054(3) 0.189(8) -0.024(4) 0.342(14) -0.012(8) 
F18 0.286(11) 0.061(3) 0.123(5) -0.024(4) 0.088(6) 0.035(5) 
F19 0.131(6) 0.187(8) 0.162(7) 0.076(6) 0.077(5) -0.045(5) 
F20 0.107(4) 0.103(4) 0.193(7) -0.038(4) 0.116(5) -0.039(4) 
F21 0.141(5) 0.189(7) 0.185(7) -0.127(6) 0.123(5) -0.135(5) 
F22 0.222(8) 0.118(5) 0.107(4) -0.021(4) 0.127(5) -0.025(5) 
F23 0.340(14) 0.359(15) 0.194(8) -0.231(10) 0.222(10) -0.278(13) 
F24 0.350(15) 0.288(13) 0.102(5) -0.002(7) 0.118(8) 0.206(13) 
O1 0.0330(17) 0.0356(18) 0.047(2) 0.0024(15) 0.0165(16) -0.0041(14) 
N1 0.032(2) 0.035(2) 0.032(2) -0.0014(16) 0.0139(17) -0.0027(16) 
N2 0.031(2) 0.056(3) 0.0264(19) -0.0028(18) 0.0147(16) -0.0067(18) 
C1 0.041(3) 0.039(3) 0.045(3) -0.004(2) 0.023(2) 0.002(2) 
C2 0.047(3) 0.065(4) 0.041(3) -0.012(3) 0.020(3) 0.002(3) 
C3 0.052(3) 0.071(4) 0.043(3) 0.002(3) 0.030(3) -0.003(3) 
C4 0.050(3) 0.053(3) 0.044(3) 0.007(3) 0.023(3) -0.007(3) 
C5 0.035(2) 0.040(3) 0.034(2) 0.001(2) 0.013(2) -0.004(2) 
C6 0.068(4) 0.034(3) 0.047(3) 0.001(2) 0.020(3) -0.005(3) 
C7 0.070(4) 0.035(3) 0.046(3) -0.009(2) 0.029(3) -0.002(3) 
C8 0.055(3) 0.051(3) 0.031(2) -0.008(2) 0.028(2) -0.020(3) 
C9 0.062(4) 0.086(5) 0.042(3) -0.024(3) 0.032(3) -0.042(4) 
C10 0.054(4) 0.127(8) 0.038(3) -0.015(4) 0.026(3) -0.038(4) 
C11 0.036(3) 0.133(8) 0.031(3) 0.008(3) 0.015(2) 0.000(4) 
C12 0.037(3) 0.081(4) 0.032(3) 0.009(3) 0.017(2) 0.003(3) 
C13 0.027(2) 0.038(2) 0.036(2) 0.008(2) 0.0120(19) -0.0029(19) 
C14 0.070(4) 0.051(3) 0.051(4) 0.000(3) 0.035(3) 0.000(3) 
C15 0.090(6) 0.081(6) 0.051(4) -0.004(4) 0.043(4) -0.001(4) 
C16 0.058(4) 0.089(5) 0.046(3) 0.018(4) 0.026(3) -0.007(4) 
C17 0.092(6) 0.054(4) 0.066(4) 0.025(4) 0.035(4) -0.005(4) 
C18 0.087(5) 0.041(3) 0.057(4) 0.009(3) 0.033(4) 0.008(3) 
C19 0.041(4) 0.047(4) 0.157(10) 0.017(5) 0.010(5) 0.010(3) 
C20 0.035(3) 0.070(5) 0.104(6) 0.015(5) 0.018(4) 0.003(3) 
C21 0.046(4) 0.064(4) 0.093(6) 0.003(4) 0.024(4) -0.018(3) 
C22 0.045(4) 0.042(4) 0.146(8) 0.015(4) 0.026(4) -0.008(3) 
C111 0.031(2) 0.025(2) 0.033(2) 0.0018(17) 0.0136(19) -0.0017(17) 
C112 0.038(3) 0.048(3) 0.039(3) 0.014(2) 0.022(2) 0.006(2) 
C113 0.048(3) 0.053(3) 0.055(3) 0.023(3) 0.025(3) 0.007(3) 
C114 0.049(3) 0.044(3) 0.063(4) 0.022(3) 0.020(3) 0.014(3) 
C115 0.038(3) 0.035(3) 0.053(3) 0.008(2) 0.015(2) 0.010(2) 
C116 0.036(2) 0.033(2) 0.036(2) 0.001(2) 0.013(2) 0.003(2) 
C117 0.086(6) 0.134(9) 0.112(7) 0.095(7) 0.062(6) 0.048(6) 
C118 0.048(3) 0.062(4) 0.064(4) 0.001(3) 0.017(3) 0.022(3) 
C121 0.029(2) 0.028(2) 0.028(2) 0.0004(17) 0.0131(17) 0.0000(17) 
C122 0.034(2) 0.029(2) 0.037(2) 0.0028(19) 0.017(2) 0.0039(18) 
C123 0.037(3) 0.038(3) 0.055(3) 0.004(2) 0.024(2) 0.009(2) 
C124 0.030(2) 0.046(3) 0.068(4) 0.009(3) 0.022(3) 0.002(2) 
C125 0.031(3) 0.036(3) 0.071(4) 0.008(3) 0.016(3) -0.001(2) 
C126 0.030(2) 0.027(2) 0.052(3) 0.001(2) 0.015(2) 0.0000(19) 
C127 0.047(3) 0.044(3) 0.104(6) 0.000(4) 0.035(4) 0.017(3) 
C128 0.036(3) 0.054(4) 0.133(8) 0.023(5) 0.021(4) -0.006(3) 
C131 0.0241(19) 0.031(2) 0.026(2) -0.0058(17) 0.0113(16) -0.0011(17) 
C132 0.032(2) 0.034(2) 0.030(2) -0.0015(18) 0.0148(18) 0.0017(18) 
C133 0.033(2) 0.042(3) 0.032(2) 0.002(2) 0.015(2) 0.002(2) 
C134 0.047(3) 0.050(3) 0.030(2) -0.005(2) 0.021(2) -0.004(2) 
C135 0.044(3) 0.037(3) 0.036(3) -0.011(2) 0.020(2) -0.005(2) 
C136 0.036(2) 0.028(2) 0.035(2) -0.0040(18) 0.016(2) -0.0030(18) 
C137 0.050(3) 0.054(3) 0.038(3) 0.008(2) 0.024(2) 0.005(3) 
C138 0.080(5) 0.047(3) 0.050(3) -0.021(3) 0.028(3) -0.008(3) 
C141 0.031(2) 0.026(2) 0.029(2) -0.0008(17) 0.0122(18) -0.0019(17) 
C142 0.035(2) 0.031(2) 0.036(2) -0.0037(19) 0.016(2) -0.0021(19) 
C143 0.038(3) 0.037(3) 0.049(3) -0.004(2) 0.015(2) -0.012(2) 
C144 0.060(4) 0.045(3) 0.044(3) -0.015(2) 0.020(3) -0.020(3) 
C145 0.068(4) 0.046(3) 0.037(3) -0.013(2) 0.026(3) -0.015(3) 
C146 0.044(3) 0.041(3) 0.031(2) -0.007(2) 0.018(2) -0.012(2) 
C147 0.069(5) 0.064(4) 0.084(5) -0.014(4) 0.044(4) -0.031(4) 
C148 0.122(7) 0.066(5) 0.070(5) -0.033(4) 0.060(5) -0.029(5) 
B1 0.027(2) 0.025(2) 0.028(2) 0.0005(18) 0.0121(19) 0.0009(18) 
  
_geom_special_details 
; 
 All esds (except the esd in the dihedral angle between two l.s. planes) 
 are estimated using the full covariance matrix.  The cell esds are taken 
 into account individually in the estimation of esds in distances, angles 
 and torsion angles; correlations between esds in cell parameters are only 
 used when they are defined by crystal symmetry.  An approximate (isotropic) 
 treatment of cell esds is used for estimating esds involving l.s. planes. 
; 
  
loop_ 
 _geom_bond_atom_site_label_1 
 _geom_bond_atom_site_label_2 
 _geom_bond_distance 
 _geom_bond_site_symmetry_2 
 _geom_bond_publ_flag 
Pt1 N2 1.980(4) . ? 
Pt1 C13 2.001(5) . ? 
Pt1 O1 2.048(4) . ? 
Pt1 N1 2.141(4) . ? 
F1 C117 1.195(12) . ? 
F2 C117 1.353(16) . ? 
F3 C117 1.254(10) . ? 
F4 C118 1.263(8) . ? 
F5 C118 1.343(9) . ? 
F6 C118 1.355(10) . ? 
F7 C127 1.305(9) . ? 
F8 C127 1.272(9) . ? 
F9 C127 1.288(10) . ? 
F10 C128 1.290(9) . ? 
F11 C128 1.296(13) . ? 
F12 C128 1.335(10) . ? 
F13 C137 1.334(7) . ? 
F14 C137 1.319(7) . ? 
F15 C137 1.348(7) . ? 
F16 C138 1.241(10) . ? 
F17 C138 1.179(9) . ? 
F18 C138 1.311(10) . ? 
F19 C147 1.325(11) . ? 
F20 C147 1.319(10) . ? 
F21 C147 1.271(9) . ? 
F22 C148 1.288(10) . ? 
F23 C148 1.237(10) . ? 
F24 C148 1.246(13) . ? 
O1 C19 1.430(8) . ? 
O1 C22 1.449(8) . ? 
N1 C5 1.343(7) . ? 
N1 C1 1.352(7) . ? 
N2 C8 1.349(8) . ? 
N2 C12 1.358(8) . ? 
C1 C2 1.371(8) . ? 
C2 C3 1.366(10) . ? 
C3 C4 1.356(9) . ? 
C4 C5 1.384(7) . ? 
C5 C6 1.511(8) . ? 
C6 C7 1.538(8) . ? 
C7 C8 1.474(9) . ? 
C8 C9 1.402(8) . ? 
C9 C10 1.361(12) . ? 
C10 C11 1.366(13) . ? 
C11 C12 1.399(10) . ? 
C13 C18 1.374(8) . ? 
C13 C14 1.391(9) . ? 
C14 C15 1.394(10) . ? 
C15 C16 1.347(12) . ? 
C16 C17 1.339(11) . ? 
C17 C18 1.398(10) . ? 
C19 C20 1.427(11) . ? 
C20 C21 1.480(11) . ? 
C21 C22 1.504(10) . ? 
C111 C116 1.377(7) . ? 
C111 C112 1.405(7) . ? 
C111 B1 1.643(7) . ? 
C112 C113 1.386(8) . ? 
C113 C114 1.377(9) . ? 
C113 C117 1.508(10) . ? 
C114 C115 1.372(9) . ? 
C115 C116 1.379(7) . ? 
C115 C118 1.488(8) . ? 
C121 C126 1.391(7) . ? 
C121 C122 1.405(6) . ? 
C121 B1 1.643(7) . ? 
C122 C123 1.382(7) . ? 
C123 C124 1.369(8) . ? 
C123 C127 1.484(8) . ? 
C124 C125 1.386(8) . ? 
C125 C126 1.380(8) . ? 
C125 C128 1.507(9) . ? 
C131 C136 1.400(6) . ? 
C131 C132 1.405(7) . ? 
C131 B1 1.627(6) . ? 
C132 C133 1.390(7) . ? 
C133 C134 1.371(8) . ? 
C133 C137 1.485(8) . ? 
C134 C135 1.397(8) . ? 
C135 C136 1.378(7) . ? 
C135 C138 1.501(8) . ? 
C141 C146 1.391(7) . ? 
C141 C142 1.395(6) . ? 
C141 B1 1.642(6) . ? 
C142 C143 1.382(7) . ? 
C143 C144 1.374(8) . ? 
C143 C147 1.487(9) . ? 
C144 C145 1.381(9) . ? 
C145 C146 1.387(7) . ? 
C145 C148 1.495(9) . ? 
  
loop_ 
 _geom_angle_atom_site_label_1 
 _geom_angle_atom_site_label_2 
 _geom_angle_atom_site_label_3 
 _geom_angle 
 _geom_angle_site_symmetry_1 
 _geom_angle_site_symmetry_3 
 _geom_angle_publ_flag 
N2 Pt1 C13 90.86(18) . . ? 
N2 Pt1 O1 175.06(16) . . ? 
C13 Pt1 O1 93.24(17) . . ? 
N2 Pt1 N1 87.78(16) . . ? 
C13 Pt1 N1 177.93(17) . . ? 
O1 Pt1 N1 88.20(15) . . ? 
C19 O1 C22 107.7(5) . . ? 
C19 O1 Pt1 116.2(4) . . ? 
C22 O1 Pt1 125.9(4) . . ? 
C5 N1 C1 118.6(5) . . ? 
C5 N1 Pt1 126.8(3) . . ? 
C1 N1 Pt1 114.1(4) . . ? 
C8 N2 C12 121.7(5) . . ? 
C8 N2 Pt1 117.8(4) . . ? 
C12 N2 Pt1 120.4(4) . . ? 
N1 C1 C2 122.0(6) . . ? 
C3 C2 C1 119.6(6) . . ? 
C4 C3 C2 118.4(6) . . ? 
C3 C4 C5 121.2(6) . . ? 
N1 C5 C4 120.2(5) . . ? 
N1 C5 C6 122.0(5) . . ? 
C4 C5 C6 117.7(5) . . ? 
C5 C6 C7 120.0(5) . . ? 
C8 C7 C6 113.6(5) . . ? 
N2 C8 C9 119.1(6) . . ? 
N2 C8 C7 117.5(5) . . ? 
C9 C8 C7 123.4(6) . . ? 
C10 C9 C8 120.1(7) . . ? 
C9 C10 C11 120.1(6) . . ? 
C10 C11 C12 119.8(7) . . ? 
N2 C12 C11 119.2(7) . . ? 
C18 C13 C14 116.7(5) . . ? 
C18 C13 Pt1 123.0(5) . . ? 
C14 C13 Pt1 120.3(4) . . ? 
C13 C14 C15 120.6(7) . . ? 
C16 C15 C14 121.5(7) . . ? 
C17 C16 C15 118.6(6) . . ? 
C16 C17 C18 121.6(7) . . ? 
C13 C18 C17 120.9(7) . . ? 
C20 C19 O1 108.7(6) . . ? 
C19 C20 C21 106.9(6) . . ? 
C20 C21 C22 106.5(6) . . ? 
O1 C22 C21 104.2(6) . . ? 
C116 C111 C112 115.3(4) . . ? 
C116 C111 B1 123.9(4) . . ? 
C112 C111 B1 120.3(4) . . ? 
C113 C112 C111 121.8(5) . . ? 
C114 C113 C112 120.9(5) . . ? 
C114 C113 C117 119.5(6) . . ? 
C112 C113 C117 119.7(6) . . ? 
C115 C114 C113 118.1(5) . . ? 
C114 C115 C116 120.6(5) . . ? 
C114 C115 C118 119.7(5) . . ? 
C116 C115 C118 119.6(6) . . ? 
C111 C116 C115 123.2(5) . . ? 
F1 C117 F3 113.1(12) . . ? 
F1 C117 F2 101.5(11) . . ? 
F3 C117 F2 99.0(10) . . ? 
F1 C117 C113 117.3(7) . . ? 
F3 C117 C113 115.6(7) . . ? 
F2 C117 C113 107.2(11) . . ? 
F4 C118 F5 111.1(7) . . ? 
F4 C118 F6 106.0(7) . . ? 
F5 C118 F6 95.1(7) . . ? 
F4 C118 C115 116.4(7) . . ? 
F5 C118 C115 113.4(6) . . ? 
F6 C118 C115 112.7(6) . . ? 
C126 C121 C122 115.9(4) . . ? 
C126 C121 B1 120.3(4) . . ? 
C122 C121 B1 123.8(4) . . ? 
C123 C122 C121 121.5(5) . . ? 
C124 C123 C122 121.7(5) . . ? 
C124 C123 C127 118.9(5) . . ? 
C122 C123 C127 119.3(5) . . ? 
C123 C124 C125 117.6(5) . . ? 
C126 C125 C124 121.1(5) . . ? 
C126 C125 C128 117.8(5) . . ? 
C124 C125 C128 121.1(6) . . ? 
C125 C126 C121 122.2(5) . . ? 
F8 C127 F9 108.7(9) . . ? 
F8 C127 F7 103.5(8) . . ? 
F9 C127 F7 99.9(8) . . ? 
F8 C127 C123 114.8(6) . . ? 
F9 C127 C123 114.1(7) . . ? 
F7 C127 C123 114.4(6) . . ? 
F10 C128 F11 104.6(8) . . ? 
F10 C128 F12 104.8(8) . . ? 
F11 C128 F12 106.5(8) . . ? 
F10 C128 C125 114.5(6) . . ? 
F11 C128 C125 113.3(8) . . ? 
F12 C128 C125 112.2(8) . . ? 
C136 C131 C132 115.7(4) . . ? 
C136 C131 B1 124.2(4) . . ? 
C132 C131 B1 119.8(4) . . ? 
C133 C132 C131 122.2(4) . . ? 
C134 C133 C132 121.0(5) . . ? 
C134 C133 C137 119.4(5) . . ? 
C132 C133 C137 119.6(5) . . ? 
C133 C134 C135 117.9(5) . . ? 
C136 C135 C134 121.2(5) . . ? 
C136 C135 C138 120.0(5) . . ? 
C134 C135 C138 118.8(5) . . ? 
C135 C136 C131 122.0(5) . . ? 
F14 C137 F13 107.2(6) . . ? 
F14 C137 F15 105.5(5) . . ? 
F13 C137 F15 104.3(5) . . ? 
F14 C137 C133 113.0(5) . . ? 
F13 C137 C133 113.3(4) . . ? 
F15 C137 C133 112.9(5) . . ? 
F17 C138 F16 108.7(10) . . ? 
F17 C138 F18 106.2(9) . . ? 
F16 C138 F18 94.1(9) . . ? 
F17 C138 C135 117.8(7) . . ? 
F16 C138 C135 113.7(6) . . ? 
F18 C138 C135 113.6(6) . . ? 
C146 C141 C142 115.4(4) . . ? 
C146 C141 B1 121.9(4) . . ? 
C142 C141 B1 122.4(4) . . ? 
C143 C142 C141 122.3(5) . . ? 
C144 C143 C142 121.1(5) . . ? 
C144 C143 C147 119.6(5) . . ? 
C142 C143 C147 119.2(6) . . ? 
C143 C144 C145 118.2(5) . . ? 
C144 C145 C146 120.3(5) . . ? 
C144 C145 C148 120.5(6) . . ? 
C146 C145 C148 119.2(6) . . ? 
C145 C146 C141 122.7(5) . . ? 
F21 C147 F20 107.4(7) . . ? 
F21 C147 F19 107.0(8) . . ? 
F20 C147 F19 99.2(8) . . ? 
F21 C147 C143 115.9(7) . . ? 
F20 C147 C143 113.4(6) . . ? 
F19 C147 C143 112.4(7) . . ? 
F23 C148 F24 106.8(11) . . ? 
F23 C148 F22 103.9(9) . . ? 
F24 C148 F22 102.0(10) . . ? 
F23 C148 C145 114.9(8) . . ? 
F24 C148 C145 113.9(8) . . ? 
F22 C148 C145 114.0(7) . . ? 
C131 B1 C141 111.3(4) . . ? 
C131 B1 C121 104.6(3) . . ? 
C141 B1 C121 112.4(4) . . ? 
C131 B1 C111 114.9(4) . . ? 
C141 B1 C111 103.8(4) . . ? 
C121 B1 C111 110.0(4) . . ? 
  
_diffrn_measured_fraction_theta_max    0.997 
_diffrn_reflns_theta_full              28.01 
_diffrn_measured_fraction_theta_full   0.997 
_refine_diff_density_max    1.792 
_refine_diff_density_min   -1.104 
_refine_diff_density_rms    0.146 
